# Supplementary material for: A systematic review of pregnancy-related clinical intervention of drug regimens due to pharmacokinetic reasons
Source: Front Med (Lausanne). 2023 Nov 29;10:1241456. doi: 10.3389/fmed.2023.1241456 (PMC10716708; doi:10.3389/fmed.2023.1241456)
Supplement: Supplementary Table 1A — Medications that have been labeled for pregnancy-related clinical intervention by the United States Food and Drug Administration. [file Table_1.XLSX]

## Sheet: Table 1A
Drug	Clinical impact of Pregnancy on Drug	Mechanism of Action	Dose Adjustment?	Intervention strategy from Product Label	Reason for Recommendation	Safety	Citation
50% magnesium sulfate	Unknown. Further investigation is required.	Unknown. Further investigation is required.	Yes	Therapy should not exceed 5 to 7 days. Both intravenous and intramuscular administration are appropriate. Intramuscular administration of the undiluted 50% solution results in therapeutic plasma levels in 60 minutes, whereas intravenous doses will provide a therapeutic level almost immediately. The rate of intravenous injection should generally not exceed 150 mg/minute (1.5 mL of a 10% concentrat…	Further investigation is required to discover the mechanisms behind the alterations in bone metabolism caused by Mg influx in neonates.	Continuous maternal administration of magnesium sulfate in pregnancy beyond 5 to 7 days can cause hypocalcemia and bone abnormalities in the developing fetus.	50% MAGNESIUM SULFATE (50% Magnesium Sulfate) [package insert]. Mukilteo, WA; HF Acquisition Co. LLC, DBA Health First; 2022.	Yokoyama K, Takahashi N, Yada Y, Koike Y, Kawamata R, Uehara R, Kono Y, Honma Y, Momoi MY. Prolonged maternal magnesium administration and bone metabolism in neonates. Early Hum Dev. 2010 Mar;86(3):187-91. doi: 10.1016/j.earlhumdev.2010.02.007.
atazanavir	↓ atazanavir	Likely due to increases in CYP3A activity. Further investigation is required.	Yes, in certain situations.	For treatment-naive and treatment-experienced patients, the recommended regimen is atazanavir capsules 300 mg with ritonavir 100 mg once daily with food. For treatment-experienced patients during the second or third trimester, when atazanavir is coadministered with either an H2RA or tenofovir DF, atazanavir 400 mg with ritonavir 100 mg once daily is recommended. Patients should be closely monitor…	Pharmacokinetic data via PBPK and maternal population studies have found that there is an increase in clearance and volume of distribution in pregnant women who are taking atazanavir. Increased clearance is likely due to increased metabolism via CYP3A. Protein binding has been referenced as a possible additional cause, but plasma protein binding were similar across trimesters and postpartum. Decr…	Unknown. Further investigation is required.	Eley T, Bertz R, Hardy H, Burger D. Atazanavir pharmacokinetics, efficacy and safety in pregnancy: a systematic review. Antivir Ther. 2013;18(3):361-75. doi: 10.3851/IMP2473.	Atazanavir (atazanavir) [package insert]. Piscataway, NJ: Camber Pharmaceuticals, Inc.; 2022.	Salama E, Eke AC, Best BM, Mirochnick M, Momper JD. Pharmacokinetic Enhancement of HIV Antiretroviral Therapy During Pregnancy. J Clin Pharmacol. 2020 Dec;60(12):1537-1550. doi: 10.1002/jcph.1714.
antithrombin (recombinant)	↓ antithrombin (recombinant)	Unknown. Further investigation is required.	Yes	Loading Dose: (100 - baseline AT activity level) x Body Weight (kg) / 1.3 Maintenance dose: (100 - baseline AT activity level) Body Weight (kg) / 5.4	The clearance and volume of distribution in pregnant patients were (1.38 L/h and 14.3 L respectively) compared to non-pregnant patients (0.67 L/h and 7.7 L respectively). Treatment goal is to restore and maintain functional antithrombin activity levels between 80% - 120% (0.8 - 1.2 IU/mL) of normal.	Studies in pregnant women have not shown that ATryn increases the risk of fetal abnormalities if administered during the third trimester of pregnancy. No data is available for use of ATryn in earlier stages of pregnancy.	Atryn (Recombinant) Highlights of Prescribing Information US GTC Biotherapeutics, Inc; Framingham, MA, USA: November 2010. Available at http://atryn.com/pdf/ATryn_PI_0409.pdf	ATryn prescribing information. Framingham, MA: GTC Biotherapeutics, Inc; December 2013. Available at: www.ATryn.com. Accessed June 13, 2022.	Atryn (antithrombin recombinant) [package insert]. Framingham, MA; rEVO Biologics, Inc.; 2021.
bamlanivimab	Unknown. Further investigation is required.	Unknown. Further investigation is required.	No	No dosage adjustment is recommended in pregnant women.	Human immunoglobulin G1 (IgG1) antibodies are known to cross the placental barrier; therefore, bamlanivimab and etesevimab have the potential to be transferred from the mother to the developing fetus. It is unknown whether the potential transfer of bamlanivimab or etesevimab provides any treatment benefit or risk to the developing fetus.	There are insufficient data to evaluate a drug-associated risk of major birth defects, miscarriage, or adverse maternal or fetal outcomes. Bamlanivimab and etesevimab should only be used during pregnancy if the potential benefit outweighs the potential risk for the mother and the fetus. There are maternal and fetal risks associated with untreated COVID-19 in pregnancy.	Bamlanivimab (bamlanivimab) [package insert]. Indianapolis, IN; Eli Lilly and Company; 2022.
bebtelovimab	Unknown. Further investigation is required.	Unknown. Further investigation is required.	No	No dose adjustments recommended for pregnant women. Should only be used during pregnancy if the potential benefit outweighs the potential risk.	The hospitalized pregnant patients who received monoclonal antibodies due to COVID-19 had favorable outcomes, but further research is recommended to fully assess safety and efficacy of monoclonal antibody treatment in pregnancy.	There are insufficient data to evaluate a drug-associated risk of major birth defects, miscarriage, or adverse maternal or fetal outcomes. There are maternal and fetal risks associated with untreated COVID-19 in pregnancy.	Mayer C, VanHise K, Caskey R, Naqvi M, Burwick RM. Monoclonal Antibodies Casirivimab and Imdevimab in Pregnancy for Coronavirus Disease 2019 (COVID-19). Obstet Gynecol. 2021 Dec 1;138(6):937-939. doi: 10.1097/AOG.0000000000004603.	Bebtelovimab (bebtelovimab) [package insert]. Indianapolis, IN; Eli Lilly and Company; 2022.
casirivimab	Unknown. Further investigation is required.	Unknown. Further investigation is required.	No	No dosage adjustment is recommended in pregnant women. Should only be used during pregnancy if the potential benefit outweighs the potential risk.	The pregnant patients who received monoclonal antibodies due to COVID-19 had favorable outcomes. Further research is recommended to fully assess safety and efficacy of monoclonal antibody treatment in pregnancy.	There is limited experience using casirivimab and imdevimab in pregnant women or breastfeeding mothers. Human immunoglobulin G1 (IgG1) antibodies are known to cross the placental barrier; therefore, casirivimab has the potential to be transferred from the mother to the developing fetus.	Mayer C, VanHise K, Caskey R, Naqvi M, Burwick RM. Monoclonal Antibodies Casirivimab and Imdevimab in Pregnancy for Coronavirus Disease 2019 (COVID-19). Obstet Gynecol. 2021 Dec 1;138(6):937-939. doi: 10.1097/AOG.0000000000004603.	Casirivimab (casirivimab) [package insert]. Tarrytown, NY; Regeneron Pharmaceuticals, Inc.; 2022.
cholic acid	Unknown. Further investigation is required.	Unknown. Further investigation is required.	Yes	Treatment with cholic acid should be initiated and monitored by an experienced hepatologist or pediatric gastroenterologist. Monitor serum aspartate aminotransferase (AST), serum alanine aminotransferase (ALT), serum gamma glutamyl transferase (GGT), alkaline phosphatase, bilirubin, and INR every month for the first 3 months, every 3 months for the next 9 months, every 6 months during the subsequ…	No studies in pregnant women or animal reproduction studies have been conducted with cholic acid. Further investigation is required.	Limited data on the safety of taking cholic acid in pregnant patients.	Cholbam™ (cholic acid) capsules [package insert]. San Diego, CA; Manchester Pharmaceuticals; 2021.
clindamycin phosphate	Unknown. Further investigation is required.	Acts locally, no systemic alterations.	Yes	Clindamycin vaginal cream 2%, can be used to treat non-pregnant women and pregnant women during the second and third trimester. The recommended dose is one applicator full of clindamycin phosphate vaginal cream 2%, (5 grams containing approximately 100 mg of clindamycin phosphate) intravaginally, preferably at bedtime, for 7 consecutive days in pregnant patients.	There are no adequate and well-controlled studies in pregnant women during the first trimester of pregnancy. Further investigation is required.	Clindamycin vaginal cream should be used during the first trimester of pregnancy only if clearly needed and the benefits outweigh the risks. Has been studied in pregnant women during the second trimester. In women treated for seven days, abnormal labor was reported in 1.1% of patients who received clindamycin vaginal cream 2% compared with 0.5% of patients who received placebo.	Cleocin® (clindamycin phosphate vaginal cream, USP) [package insert]. New York, NY; Pfizer Inc.; 2022.
darunavir	↓ darunavir	Likely due to metabolism via CYP3A4. Further investigation required.	Yes	600 mg (one 600 mg tablet) taken with ritonavir 100 mg twice daily and with food. Darunavir 800 mg taken with ritonavir 100 mg once daily should only be considered in certain pregnant patients who are already on a stable darunavir 800 mg with ritonavir 100 mg once daily regimen prior to pregnancy, are virologically suppressed (HIV-1 RNA less than 50 copies per mL), and in whom a change to twice d…	Total darunavir exposures were generally lower during pregnancy compared to postpartum period. Likely a result of increased CYP3A4 metabolism. Ritonavir and darunavir biotransformation is mediated by CYP3A4. Changes in ritonavir exposure, resulting from pregnancy-induced CYP3A4 activity, results in altered darunavir CYP3A4/P-gp inhibition during pregnancy compared with non-pregnant women. Changes…	Darunavir/ritonavir was well tolerated during pregnancy and postpartum.	Prezista (darunavir) [package insert]. Titusville, NJ; Janssen Therapeutics; 2022.	Schalkwijk S, Ter Heine R, Colbers A, Capparelli E, Best BM, Cressey TR, Greupink R, Russel FGM, Moltó J, Mirochnick M, Karlsson MO, Burger DM. Evaluating darunavir/ritonavir dosing regimens for HIV-positive pregnant women using semi-mechanistic pharmacokinetic modelling. J Antimicrob Chemother. 2019 May 1;74(5):1348-1356. doi: 10.1093/jac/dky567.
darunavir, cobicistat, emtricitabine, and tenofovir alafenamide	↓ darunavir ↓ cobicistat	Likely due to metabolism via CYP3A4, further investigation is required.	contraindicated	Should not be initiated in pregnant individuals. An alternative regimen is recommended for individuals who become pregnant during therapy with Darunavir, Cobicistat, Emtricitabine, and Tenofovir alafenamide.	Not recommended during pregnancy because of substantially lower exposures of darunavir and cobicistat during the second and third trimesters of pregnancy. Cobicistat is primarily metabolied by CYP3A4 and minorly by CYP2D6, which likely contributes to the decreased exposure. Cobicistat is used on a pharmacokinetic enhancer to inhibit CYP3A4 metabolism of antiretrovirals, so with decreased concentr…	Prospective pregnancy data from the APR are not sufficient to adequately assess the risk of birth defects or miscarriage. However, available data from the APR show no statistically significant difference in the overall risk of major birth defects for darunavir, cobicistat, emtricitabine, or tenofovir alafenamide (TAF) compared with the background rate for major birth defects of 2.7% in a U.S. ref…	Symtuza (Darunavir, Cobicistat, Emtricitabine, and Tenofovir alafenamide) [package insert]. Titusville, NJ; Janssen Products LP; 2022.	Momper JD, Wang J, Stek A, Shapiro DE, Scott GB, Paul ME, Febo IL, Burchett S, Smith E, Chakhtoura N, Denson K, Rungruengthanakit K, George K, Yang DZ, Capparelli EV, Mirochnick M, Best BM; IMPAACT P1026s Protocol Team. Pharmacokinetics of darunavir and cobicistat in pregnant and postpartum women with HIV. AIDS. 2021 Jul 1;35(8):1191-1199. doi: 10.1097/QAD.0000000000002857.
doxylamine succinate and pyridoxine hydrochloride	No change.	Unknown. Further investigation is required.	No	Indicated for the treatment of nausea and vomiting of pregnancy in women who do not respond to conservative management. On Day 1, take one tablet at bedtime. On Day 2, if symptoms are not adequately controlled, the dose can be increased to one tablet in the morning and one tablet at bedtime. The maximum recommended dose is two tablets daily, one in the morning and one at bedtime.	No difference in clearance between pregnant and nonpregnant women.	Extensively tested in pregnant women, drug is indicated for use during pregnancy. There is an absence of teratogenic effects.	Matok I, Clark S, Caritis S, Miodovnik M, Umans J, Hankins G, Koren G. Comparing the pharmacokinetics of doxylamine/pyridoxine delayed-release combination in nonpregnant women of reproductive age and women in the first trimester of pregnancy. J Clin Pharmacol. 2013 Mar;53(3):334-8. doi: 10.1177/0091270012445207.	Madjunkova S, Maltepe C, Koren G. The delayed-release combination of doxylamine and pyridoxine (Diclegis®/Diclectin ®) for the treatment of nausea and vomiting of pregnancy. Paediatr Drugs. 2014 Jun;16(3):199-211. doi: 10.1007/s40272-014-0065-5.	Bonjesta® (doxylamine succinate and pyridoxine hydrochloride) Extended-release tablets 20mg/20mg [package insert]. Blainville, Quebec Canada; Duchesnay USA, Inc.; 2018.
elvitegravir, cobicistat, emtricitabine, and tenofovir disoproxil fumarate	↓ elvitegravir ↓ cobicistat	Both decreases in drug concentrations are likely due to metabolism via CYP3A4, but further investigation is required.	contraindicated	Should not be initiated in pregnant individuals. An alternative regimen is recommended for individuals who become pregnant during therapy with elvitegravir, cobicistat, emtricitabine, and tenofovir disoproxil fumarate.	Not recommended for use during pregnancy because of substantially lower exposures of cobicistat and elvitegravir during the second and third trimesters of pregnancy. Elvitegravir is highly protein bound to albumin, which can potentially decrease serum concentrations. Also a substrate of P-gp, which can result in increased clearance and decreased exposure. Emtricitabine is majorly excreted renally…	Use of this therapy during pregnancy can result in subclinical therapy. Available data from the APR show no significant difference in the overall risk of major birth defects for elvitegravir, cobicistat, emtricitabine, or TDF compared with the background rate for major birth defects of 2.7% in a U.S. reference population of the Metropolitan Atlanta Congenital Defects Program (MACDP).	Stribild (elvitegravir, cobicistat, emtricitabine, and tenofovir disoproxil fumarate) [package insert]. Foster City, CA; Gilead Sciences, Inc.; 2021.	Momper JD, Best BM, Wang J, Capparelli EV, Stek A, Barr E, Badell ML, Acosta EP, Purswani M, Smith E, Chakhtoura N, Park K, Burchett S, Shapiro DE, Mirochnick M; IMPAACT P1026s Protocol Team. Elvitegravir/cobicistat pharmacokinetics in pregnant and postpartum women with HIV. AIDS. 2018 Nov 13;32(17):2507-2516. doi: 10.1097/QAD.0000000000001992.
emtricitabine, rilpivirine hydrochloride, and tenofovir alafenamide	↓ rilpivirine hydrochloride	Likely due to increases in CYP3A4 activity. Further investigation is required.	No	For pregnant patients who are already on treatment prior to pregnancy and who are virologically suppressed (HIV-1 RNA less than 50 copies per mL), one tablet taken once daily may be continued. Lower exposures of rilpivirine were observed during pregnancy, therefore viral load should be monitored closely.	The exposure of total rilpivirine was approximately 30 to 40% lower during pregnancy compared with postpartum (6 to 12 weeks). Metabolized via CYP3A4. Rilpivirine is approximately 99.7% bound to plasma proteins, primarily albumin; however, changes in plasma protein content during pregnancy only had a limited impact. Emtricitabine is majorly excreted renally, but the changes do not warrant dose ad…	Rilpivirine was well tolerated during pregnancy and postpartum. Despite lower exposure during late pregnancy, virologic suppression was maintained and no perinatal transmission was observed.	Odefsey (emtricitabine, rilpivirine hydrochloride, and tenofovir alafenamide) [package insert]. Foster City, CA; Gilead Sciences, Inc.; 2021.	Osiyemi O, Yasin S, Zorrilla C, Bicer C, Hillewaert V, Brown K, Crauwels HM. Pharmacokinetics, Antiviral Activity, and Safety of Rilpivirine in Pregnant Women with HIV-1 Infection: Results of a Phase 3b, Multicenter, Open-Label Study. Infect Dis Ther. 2018 Mar;7(1):147-159. doi: 10.1007/s40121-017-0184-8.
emtricitabine, rilpivirine hydrochloride, and tenofovir disoproxil fumarate	↓ rilpivirine	Likely due to metabolism vis CYP3A4. Further investigation is required.	No	For pregnant patients who are already on treatment prior to pregnancy and who are virologically suppressed (HIV-1 RNA less than 50 copies per mL), one tablet taken once daily may be continued. Lower exposures of rilpivirine were observed during pregnancy; therefore, viral load should be monitored closely.	The exposure (C 0h and AUC) of total RPV was approximately 30 to 40% lower during pregnancy compared with postpartum (6 to 12 weeks). Metabolized via CYP3A4. Rilpivirine is about 99.7% bound to plasma protein (albumin) during pregnancy, but limited impact on the fraction of unbound rilpivirine. Emtricitabine is majorly excreted renally, but the changes do not warrant dose adjustment.	Rilpivirine exposure is substantially lowered during late pregnancy. Despite lower exposure, virologic suppression was maintained and no perinatal transmission was observed.	Complera (emtricitabine, rilpivirine hydrochloride, and tenofovir disoproxil fumarate) [package insert]. Indiana, PA; Remedy Repack Inc.; 2021.	Osiyemi O, Yasin S, Zorrilla C, Bicer C, Hillewaert V, Brown K, Crauwels HM. Pharmacokinetics, Antiviral Activity, and Safety of Rilpivirine in Pregnant Women with HIV-1 Infection: Results of a Phase 3b, Multicenter, Open-Label Study. Infect Dis Ther. 2018 Mar;7(1):147-159. doi: 10.1007/s40121-017-0184-8.	Tran AH, Best BM, Stek A, Wang J, Capparelli EV, Burchett SK, Kreitchmann R, Rungruengthanakit K, George K, Cressey TR, Chakhtoura N, Smith E, Shapiro DE, Mirochnick M; IMPAACT P1026s Protocol Team. Pharmacokinetics of Rilpivirine in HIV-Infected Pregnant Women. J Acquir Immune Defic Syndr. 2016 Jul 1;72(3):289-96. doi: 10.1097/QAI.0000000000000968.
epoetin alfa	No change.	Not clinically relevant.	Yes	Use only single-dose vials. Do not mix with bacteriostatic saline when administering to pregnant women because it contains benzyl alcohol.	Unknown. Further investigation is required.	Serious and fatal reactions including "gasping syndrome" can occur in neonates and infants treated with benzyl alcohol-preserved drugs, including epoetin alfa multiple-dose vials. "Gasping syndrome" is characterized by central nervous system depression, metabolic acidosis, and gasping respirations. There is potential for risks to fetuses and infants exposed to benzyl alcohol in utero.	Retacrit (epoetin alfa) [package insert]. Lake Forest, IL; Hospira, Inc.; 2021.
erythromycin	Unknown. Further investigation is required.	Unknown. Further investigation is required.	No	Utilized for urogenital infections during pregnancy due to chlamydia trachomatis. Although the optimal dose and duration of therapy have not been established, the suggested treatment is erythromycin 500 mg, by mouth, 4 times a day on an empty stomach for at least 7 days. For women who cannot tolerate this regimen, a decreased dose of 250 mg, by mouth, 4 times a day should be used for at least 14 …	The clearance rate of macrolides in pregnancy is faster in late pregnancy.	Macrolides cross the placenta, but the placenta is an effective barrier that reduces fetal exposure. Observational studies in humans have reported cardiovascular malformations may occur after exposure to erythromycin during early pregnancy.	Heikkinen T, Laine K, Neuvonen PJ, Ekblad U. The transplacental transfer of the macrolide antibiotics erythromycin, roxithromycin and azithromycin. BJOG. 2000 Jun;107(6):770-5. doi: 10.1111/j.1471-0528.2000.tb13339.x.	Ramsey PS, Vaules MB, Vasdev GM, Andrews WW, Ramin KD. Maternal and transplacental pharmacokinetics of azithromycin. Am J Obstet Gynecol. 2003 Mar;188(3):714-8. doi: 10.1067/mob.2003.141.	Bahat Dinur A, Koren G, Matok I, Wiznitzer A, Uziel E, Gorodischer R, Levy A. Fetal safety of macrolides. Antimicrob Agents Chemother. 2013 Jul;57(7):3307-11. doi: 10.1128/AAC.01691-12.	Erythromycin (erythromycin) [package insert]. Piscataway, NJ; Appco Pharma LLC; 2020.
erythropoietin	No change.	Not clinically relevent.	Yes	Use only single-dose vials. Do not dilute. Do not mix with bacteriostatic saline when administering to pregnant women.	Further investigation is required.	Serious and fatal reactions including "gasping syndrome" can occur in neonates and infants treated with benzyl alcohol-preserved drugs, including erythropoietin multiple-dose vials. The "gasping syndrome" is characterized by central nervous system depression, metabolic acidosis, and gasping respirations. There is a potential for similar risks to fetuses and infants exposed to benzyl alcohol in ut…	Procrit (erythropoietin) [package insert]. Horsham, PA; Janssen Products, LP; 2022.
etesevimab	Unknown. Further investigation is required.	Unknown. Further investigation is required.	No	No dosage adjustment is recommended in pregnant women.	Human immunoglobulin G1 (IgG1) antibodies are known to cross the placental barrier; therefore, bamlanivimab and etesevimab have the potential to be transferred from the mother to the developing fetus. It is unknown whether the potential transfer of bamlanivimab or etesevimab provides any treatment benefit or risk to the developing fetus.	Etesevimab should only be used during pregnancy if the potential benefit outweighs the potential risk for the mother and the fetus. There are maternal and fetal risks associated with untreated COVID-19 in pregnancy .	Etesevimab (etesevimab) [package insert]. Indianapolis, IN; Eli Lilly and Company; 2022.
etravirine	↑ etravirine (not considered clinically significant)	Likely due to metabolism of etravirine through CYP3A4, CYP2C9, and CYP2C19. Further investigation required.	No	200 mg (one 200 mg tablet or two 100 mg tablets) taken twice daily following a meal.	Etravirine's apparent oral clearance is reduced by 52% in the 3rd trimester of pregnancy compared to postpartum. There is an increase in etravirine exposure during the 3rd trimester. There is a unique metabolism of etravirine by CYP3A4, CYP2C9, and CYP2C19 when compared to other antiretrovirals. CYP3A4 and CYP2C9 activity increases during pregnancy while CYP2C19 activity is inhibited. Mild inhibi…	Unknown. Further investigation is required.	Mulligan N, Schalkwijk S, Best BM, Colbers A, Wang J, Capparelli EV, Moltó J, Stek AM, Taylor G, Smith E, Hidalgo Tenorio C, Chakhtoura N, van Kasteren M, Fletcher CV, Mirochnick M, Burger D. Etravirine Pharmacokinetics in HIV-Infected Pregnant Women. Front Pharmacol. 2016 Aug 4;7:239. doi: 10.3389/fphar.2016.00239.	Etravirine (etravirine) [package insert]. Delran, NJ; Carnegie Pharmaceuticals LLC; 2021.
folic acid	↑ need for folic acid	Increased need for folic acid during pregnancy.	Yes	0.8 mg for pregnant and lactating women, but never less than 0.1 mg/day.	Unknown. Further investigation is required.	Deficiency of folic acid will result in fetal damage. Studies in pregnant women have not shown that folic acid increases the risk of fetal abnormalities if administered during pregnancy.	Folic Acid (folic acid) [package insert]. PD-Rx Pharmaceuticals, Inc.; 2022.
fosamprenavir calcium	↓ fosamprenavir calcium	Likely due to metabolism via CYP3A4. Further investigation required.	No	Fosamprenavir 700 mg twice daily plus ritonavir 100 mg twice daily should only be considered in women who are already on a stable twice-daily regimen of fosamprenavir/ritonavir 700 mg/100 mg prior to pregnancy and who are virologically suppressed (HIV-1 RNA less than 50 copies per mL). Viral load should be monitored closely to ensure viral suppression is maintained.	Lower exposures of amprenavir (metabolite of fosamprenavir) were observed during pregnancy. Increased clearance and volume of distribution. Compared to postpartum, AUC was 35% lower in the second trimester and 25% lower in the third trimester. The lower exposure is not expected to be considered clinically relevant in patients who are virologically suppressed. Likely due to metabolism via CYP3A4. …	Unknown. Further investigation is required.	Eke AC, Wang J, Amin K, Shapiro DE, Stek A, Smith E, Chakhtoura N, Basar M, George K, Knapp KM, João EC, Rungruengthanakit K, Capparelli E, Burchett S, Mirochnick M, Best BM; P1026s Protocol Team. Fosamprenavir with Ritonavir Pharmacokinetics during Pregnancy. Antimicrob Agents Chemother. 2020 Mar 24;64(4):e02260-19. doi: 10.1128/AAC.02260-19.	Fosamprenavir Calcium (fosamprenavir calcium) [package insert]. Morgantown, WV; Mylan Pharmaceuticals, Inc.; 2022
heparin sodium	No change.	Unknown. Further investigation is required.	Yes	Preservative-free formulation recommended.	Further investigation is required.	There are no available data on heparin sodium use in pregnant women to inform a drug- associated risk of major birth defects and miscarriage. In published reports, there is no evidence of an increased risk of adverse maternal or fetal outcomes in humans.	Heparin Sodium (heparin sodium) [package insert]. Bastian, VA; Henry Schein, Inc.; 2022.
human insulin	↑ need for insulin in the 2nd and 3rd trimester	The requirement for insulin increases during pregnancy. Further investigation is required.	Yes	Intravenous administration of insulin is commonly used in the treatment of diabetic ketoacidosis, peri-operative management of diabetes, and maintenance of glycemic control during labor in pregnant diabetic women. For intravenous use, Novolin R should be used at concentrations from 0.05 units/mL to 1.0 unit/mL in infusion systems using polypropylene infusion bags. Novolin R can be used with the f…	Insulin requirements generally increase during the second and third trimesters, and rapidly decline after delivery. Pregnancy is a state of insulin resistance.	There are risks to the mother and fetus associated with poorly controlled diabetes in pregnancy. Poorly controlled diabetes in pregnancy increases the maternal risk for diabetic ketoacidosis, pre-eclampsia, spontaneous abortions, preterm delivery, and delivery complications. Also increases the fetal risk for major birth defects, stillbirth, and macrosomia-related morbidity.	Achong N, McIntyre HD, Callaway L. Factors determining insulin requirements in women with type 1 diabetes mellitus during pregnancy: a review. Obstet Med. 2014 Jun;7(2):52-9. doi: 10.1177/1753495X13516442.	Novolin R (human insulin injection, solution) [package insert]. Plainsboro, NJ; A-S Medication Solutions; 2020.	Kambara M, Yanagisawa K, Tanaka S, Suzuki T, Babazono T. Changes in insulin requirements during pregnancy in Japanese women with type 1 diabetes. Diabetol Int. 2018 Aug 21;10(2):102-108. doi: 10.1007/s13340-018-0369-8.
immune globulin (human)	Unknown. Further investigation is required.	Unknown. Further investigation is required.	Yes	Do not give for routine prophylaxis of rubella in early pregnancy to an unexposed woman; 0.55 mL/kg as a single dose within 72 hours of exposure. Not recommended for routine use; may reduce, but not eliminate, risk for rubella. In adults, total dose volumes >10 mL should be split into multiple injections given at different sites. Only administer to exposed pregnant women who will not consider a t…	Unknown. Further investigation is required.	Unknown. Further investigation is required.	GamaSTAN (immune globulin (human)) [package insert]. Research Triangle Park, NC; Grifols USA, LLC; 2020.
isoniazid	↓ isoniazid	Unknown. Further investigation is required.	Yes	The initial treatment regimen should consist of isoniazid and rifampin. Ethambutol should be included unless primary isoniazid resistance is unlikely. The CDC recommends that in order to treat latent TB Infection (LTBI) isoniazid (INH) administered either daily or twice weekly for 9 months is the standard regimen for the treatment of LTBI in pregnant women. Women taking INH should also take pyrid…	Increased clearance during pregnancy.	Since Isoniazid is known to cross the placental barrier, neonates of isoniazid treated mothers should be carefully observed for any evidence of adverse effects.	Centers for Disease Control and Prevention. Tuberculosis and Pregnancy. https://www.cdc.gov/tb/publications/factsheets/specpop/pregnancy.htm#:~:text=Latent%20TB%20Infection%20(LTBI)%20%E2%80%93,pyridoxine%20(vitamin%20B6)%20supplementation. (accessed 2022 July 27).	Gausi K, Wiesner L, Norman J, Wallis CL, Onyango-Makumbi C, Chipato T, Haas DW, Browning R, Chakhtoura N, Montepiedra G, Aaron L, McCarthy K, Bradford S, Vhembo T, Stranix-Chibanda L, Masheto GR, Violari A, Mmbaga BT, Aurpibul L, Bhosale R, Nevrekhar N, Rouzier V, Kabugho E, Mutambanengwe M, Chanaiwa V, Nyati M, Mhembere T, Tongprasert F, Hesseling A, Shin K, Zimmer B, Costello D, Jean-Philippe P…	Abdelwahab MT, Leisegang R, Dooley KE, Mathad JS, Wiesner L, McIlleron H, Martinson N, Waja Z, Letutu M, Chaisson RE, Denti P. Population Pharmacokinetics of Isoniazid, Pyrazinamide, and Ethambutol in Pregnant South African Women with Tuberculosis and HIV. Antimicrob Agents Chemother. 2020 Feb 21;64(3):e01978-19. doi: 10.1128/AAC.01978-19.	Isoniazid (isoniazid) [package insert]. Whitby, ON, Canada; Patheon Inc..; 2017.
levothyroxine sodium	↑ need for levothyroxine sodium	The body has a need for higher levels of T4 as pregnancy progresses.	Yes	Pregnancy may require the use of higher doses of levothyroxine sodium capsules. Measure serum TSH and free-T4 as soon as pregnancy is confirmed and, at a minimum, during each trimester of pregnancy. In patients with primary hypothyroidism, maintain serum TSH in the trimester-specific reference range. For patients with serum TSH above the normal trimester specific range, increase the dose of levot…	Higher levels of thyroid hormone are needed during pregnancy and, in women with normal thyroid function, the thyroid gland increases the production of thyroid hormone to meet this increased need. In hypothyroid women, this often means that the dose of levothyroxine needs to be increased during pregnancy. Many endocrinologists advise pregnant women to take a higher dose of Levothyroxine as soon as…	There is a long experience of levothyroxine use in pregnant women, including data from post-marketing studies that have not reported increased rates of fetal malformations, miscarriages or other adverse maternal or fetal outcomes.	Stagnaro-Green A, Abalovich M, Alexander E, Azizi F, Mestman J, Negro R, Nixon A, Pearce EN, Soldin OP, Sullivan S, Wiersinga W; American Thyroid Association Taskforce on Thyroid Disease During Pregnancy and Postpartum. Guidelines of the American Thyroid Association for the diagnosis and management of thyroid disease during pregnancy and postpartum. Thyroid. 2011 Oct;21(10):1081-125. doi: 10.1089…	Levothyroxine Sodium (levothyroxine sodium) [package insert]. Philadelphia, PA;Lennet Company, Inc; 2022.
liothyronine sodium	↑ need for liothyronine sodium.	The body has a need for higher levels of T3 as pregnancy progresses.	Yes	Pregnancy may require the use of higher doses of thyroid hormone. It should be noted that the general recommendation for hypothyroidism indicates dosing pregnancy women with levothyroxine (T4) instead of liothyronine (T3). Early in pregnancy, T4 has the ability to enter the baby's brain, but T3 cannot. Therefore, T4 is a stronger recommendation for treating hypothyroidism in pregnancy. Measure se…	There is an increased demand for T3 throughout pregnancy. An increase in dose is required to maintain the therapeutic range to prevent subclinical results. The reference ranges for maintenance per trimester for T3 is 0.90–2.51, 1.99–2.87 and 1.20–2.70 ng/mL respectively.	Maternal hypothyroidism during pregnancy is associated with a higher rate of complications, including spontaneous abortion, gestational hypertension, pre-eclampsia, stillbirth, and premature delivery. Untreated maternal hypothyroidism may have an adverse effect on fetal neurocognitive development. Data from post marketing studies have not reported increased rates of fetal malformations, miscarria…	Talat A, Khan AA, Nasreen S, Wass JA. Thyroid Screening During Early Pregnancy and the Need for Trimester Specific Reference Ranges: A Cross-Sectional Study in Lahore, Pakistan. Cureus. 2019 Sep 15;11(9):e5661. doi: 10.7759/cureus.5661.	Stagnaro-Green A, Abalovich M, Alexander E, Azizi F, Mestman J, Negro R, Nixon A, Pearce EN, Soldin OP, Sullivan S, Wiersinga W; American Thyroid Association Taskforce on Thyroid Disease During Pregnancy and Postpartum. Guidelines of the American Thyroid Association for the diagnosis and management of thyroid disease during pregnancy and postpartum. Thyroid. 2011 Oct;21(10):1081-125. doi: 10.1089…	Liothyronine Sodium (liothyronine sodium) [package insert]. Cranberry, NJ; Sun Pharmaceutical Industries, Inc.; 2022.	Almomin AMS, Mansour AA, Sharief M. Trimester-Specific Reference Intervals of Thyroid Function Testing in Pregnant Women from Basrah, Iraq Using Electrochemiluminescent Immunoassay. Diseases. 2016 Apr 26;4(2):20. doi: 10.3390/diseases4020020.
lithium	↓ lithium	Renal lithium clearance increases proportionally to its decreases in serum concentration during pregnancy. Lithium is primarily excreted in urine.	Yes	If the decision is made to continue lithium treatment during pregnancy, monitor serum lithium concentrations and adjust the dosage as needed in a pregnant woman. Avoid sodium restriction or diuretic administration. To decrease the risk of postpartum lithium intoxication, decrease or discontinue lithium therapy two to three days before the expected delivery date to reduce neonatal concentrations a…	Lithium is filtered by the glomerulus, and 80% is reabsorbed by passive diffusion in the proximal tubule. Increased clearance, likely a result of lithium being primarily renally excreted. The elimination half-life of lithium is approximately 18 to 36 hours. Lithium excretion in feces is insignificant.	There are concerns for maternal and/or neonatal lithium toxicity during late pregnancy and the postpartum period.	Lithium (lithium) capsule [package insert]. Mawah, NJ; NuCare Pharmaceuticals, Inc.; 2022.
lopinavir and ritonavir	↓ lopinavir ↓ ritonavir	Likely due to increased metabolism via CYP3A4 and high protein binding. Further investigation required.	No	400/100 mg twice daily in pregnant patients with no documented lopinavir-associated resistance substitutions. Avoid use of lopinavir and ritonavir oral solution in pregnant women due to alcohol content. There are insufficient data to recommend a lopinavir and ritonavir dose for pregnant patients with any documented lopinavir and ritonavir-associated resistance substitutions. Once daily lopinavir …	Both the second and third trimesters had similar increases of 17% in clearance; postpartum women had a decrease of 26.4% in clearance compared with that of nonpregnant subjects. Although the LPV exposure in the third trimester of pregnancy was lower than that of nonpregnant subjects receiving the same formulation or in the postpartum period, the increase in LPV clearance during pregnancy is compe…	The prevalence of birth defects in live births was 2.1% following first-trimester exposure to lopinavir-containing regimens and 3.0% following second and third trimester exposure to lopinavir-containing regimens.	Salem AH, Jones AK, Santini-Oliveira M, Taylor GP, Patterson KB, Nilius AM, Klein CE. No Need for Lopinavir Dose Adjustment during Pregnancy: a Population Pharmacokinetic and Exposure-Response Analysis in Pregnant and Nonpregnant HIV-Infected Subjects. Antimicrob Agents Chemother. 2015 Nov 2;60(1):400-8. doi: 10.1128/AAC.01197-15.	Lopinavir and Ritonavir (lopinavir and ritonavir) [package insert]. Picataway, NJ; Camber Pharmaceuticals, Inc.; 2021.	Daud AN, Bergman JE, Bakker MK, Wang H, Kerstjens-Frederikse WS, de Walle HE, Groen H, Bos JH, Hak E, Wilffert B. P-Glycoprotein-Mediated Drug Interactions in Pregnancy and Changes in the Risk of Congenital Anomalies: A Case-Reference Study. Drug Saf. 2015 Jul;38(7):651-9. doi: 10.1007/s40264-015-0299-3.	Patterson KB, Dumond JB, Prince HA, et al. Protein binding of lopinavir and ritonavir during 4 phases of pregnancy: implications for treatment guidelines. J Acquir Immune Defic Syndr. 2013 May 1;63(1):51–58.
methadone hydrochloride	↓ methadone hydrochloride	Increase in clearance likely due to CYP3A4 metabolism. Further investigation is required.	Yes	During pregnancy, a woman’s methadone dose may need to be increased or the dosing interval decreased. A target trough concentration of 0.78 μmol/L may be used for titrating the methadone dose.	Methadone clearance may be increased during pregnancy. Pregnant women appear to have significantly lower trough plasma methadone concentrations, increased plasma methadone clearance, and shorter methadone half-life than after delivery. Metabolized majorly via CYP2B6, CYP3A4, followed by 2C19, 2D6, and to a lesser extent, CYP2C18, 3A7, 2C8, 2C9, 3A5, and 1A2. CYP3A4 is thought to be the main reaso…	Most data on methadone use in pregnancy does not indicate an increased risk of major malformations. Methadone maintenance programs have been reported to have improved prenatal care leading to reduced incidence of obstetric and fetal complications and neonatal morbidity/mortality when compared to women using illicit drugs. Most maternal exposure in studies appears to occur after the first trimeste…	Shiu JR, Ensom MH. Dosing and monitoring of methadone in pregnancy: literature review. Can J Hosp Pharm. 2012 Sep;65(5):380-6. doi: 10.4212/cjhp.v65i5.1176.	Methadone Hydrochloride (methadone hydrochloride) [package insert]. Central Islip, NY; Ascent Pharmaceuticals, Inc.; 2022.	Daud AN, Bergman JE, Bakker MK, Wang H, Kerstjens-Frederikse WS, de Walle HE, Groen H, Bos JH, Hak E, Wilffert B. P-Glycoprotein-Mediated Drug Interactions in Pregnancy and Changes in the Risk of Congenital Anomalies: A Case-Reference Study. Drug Saf. 2015 Jul;38(7):651-9. doi: 10.1007/s40264-015-0299-3.
methyl salicylate, menthol and capsaicin	Unknown. Further investigation is required.	Acts locally, no significant systemic alterations.	Yes	Topical formulation. Do not use more than 4 times daily if pregnant.	Safe and effective dose. Low systemic exposure. Some active ingredients are toxins when used orally at high doses, Oral doses are thousands of times larger systemically than after topical use at the recommended maximum dose (i.e. 10 g/day).	When used as indicated, likely safe for pregnant women and their fetus.	Alsaad AM, Fox C, Koren G. Toxicology and teratology of the active ingredients of professional therapy MuscleCare products during pregnancy and lactation: a systematic review. BMC Complement Altern Med. 2015 Mar 5;15:40. doi: 10.1186/s12906-015-0585-8.	Overtime-X (methyl salicylate, menthol, capsaicin) lotion [package insert]. Newport Beach, CA; Physician's Science and Nature Inc.; 2019.
metronidazole	No clinically significant changes.	Unknown. Further investigation is required.	Yes	Pregnant patients should not be treated during the first trimester. In pregnant patients for whom alternative treatment has been inadequate, the one-day oral course of therapy should not be used, as it results in higher serum levels which can reach the fetal circulation. When repeat courses of the drug are required, it is recommended that an interval of four to six weeks elapse between oral thera…	There are no adequate and well controlled studies of metronidazole in pregnant women. Metronidazole crosses the placental barrier and its effects on the human fetal organogenesis are not known. Metronidazole total body exposure were highest in women during early term pregnancy, weight-corrected estimates of exposure maximum plasma drug concentration, and the area under the plasma concentration-ve…	Most studies did not show an increased risk for congenital anomalies or other adverse fetal outcomes following exposure during pregnancy.	Wang X, Nanovskaya TN, Zhan Y, Abdel-Rahman SM, Jasek M, Hankins GD, Ahmed MS. Pharmacokinetics of metronidazole in pregnant patients with bacterial vaginosis. J Matern Fetal Neonatal Med. 2011 Mar;24(3):444-8. doi: 10.3109/14767058.2010.497573.	Metronidazole (metronidazole) [package insert]. Burbank, CA; Bryant Ranch Prepack; 2022.
phenytoin	↓ phenytoin	Likely due to the decrease in binding proteins that occurs during pregnancy. Phenytoin is highly protein bound and is a low clearance drug.	Yes	Decreased serum concentrations of phenytoin may occur during pregnancy. Periodic measurement of serum phenytoin concentrations should be performed, and the dosage should be adjusted as necessary. Because of potential changes in protein binding during pregnancy, the monitoring of phenytoin serum levels should be based on the unbound fraction.	The plasma clearance of phenytoin generally increases during pregnancy, reaches a peak in the third trimester and then returns to levels of pre-pregnancy after a few weeks or months of delivery. This is likely a result of decreases in protein binding.	Unknown. Further investigation is required.	Chen SS, Perucca E, Lee JN, Richens A. Serum protein binding and free concentration of phenytoin and phenobarbitone in pregnancy. Br J Clin Pharmacol. 1982 Apr;13(4):547-52. doi: 10.1111/j.1365-2125.1982.tb01420.x.	Brodtkorb E, Reimers A. Seizure control and pharmacokinetics of antiepileptic drugs in pregnant women with epilepsy. Seizure. 2008 Mar;17(2):160-5. doi: 10.1016/j.seizure.2007.11.015.	Dilantin® (extended phenytoin sodium capsules, USP) [package insert]. New York, NY; Pfizer Inc.; 2022.
potassium iodide (KI)	Unknown. Further investigation is required.	Unknown. Further investigation is required.	No	2 tablets (whole or crushed) daily (130 mg). No dose adjustment. Take as directed and call a doctor as soon as possible. Repeat dosing should be avoided.	Unknown. Further investigation is required.	It is recommended that thyroid function be checked in babies less than 1 month of age that take KI. Women who are pregnant or breastfeeding should also be checked by a doctor if repeat dosing is necessary. Although these precautions should be taken, the benefits of short-term use of KI to block uptake of radioactive iodine by the thyroid gland far exceed its chances of side effects.	Lebsir D, Guemri J, Kereselidze D, Grison S, Benderitter M, Pech A, Cohen D, Benadjaoud MA, Lestaevel P, Souidi M. Repeated potassium iodide exposure during pregnancy impairs progeny's brain development. Neuroscience. 2019 May 15;406:606-616. doi: 10.1016/j.neuroscience.2019.02.016.	Iosat (potassium iodide) [package insert]. St. Georges, UT; Anbex Inc.; 2022.
rho(D) immune globulin (human)	Unknown. Further investigation is required.	Unknown. Further investigation is required.	Yes	If the dose is administered antepartum, ideally at 28 weeks, it is essential that the mother receive another dose after delivery of a Rho(D) positive infant. If the father can be determined to be Rho(D) negative, dose need not be given. Dose should be administered within 72 hours to all nonimmunized Rho(D) negative women who have undergone spontaneous or induced abortion, following ruptured tubal…	Unknown. Further investigation required.	The incidence of isoimmunization can be further reduced from approximately 1.6% to less than 0.1% by administering Rho(D) Immune Globulin (Human) in two doses, one antenatal at 28 weeks’ gestation and another following delivery.	Hyperrho S/D Full Dose (Rho (D) immune globulin (human)) [package insert]. Research Triangle Park, NC; Grifols USA, LLC; 2020.	Bowman JM, Chown B, Lewis M, Pollock JM. Rh isoimmunization during pregnancy: antenatal prophylaxis. Can Med Assoc J. 1978 Mar 18;118(6):623-7.
rilpivirine hydrochloride	↓ rilpivirine hydrochloride	Likely due to increased activity of CYP3A4. Further investigation is required.	No	For pregnant patients who are already on a stable rilpivirine hydrochloride regimen prior to pregnancy and who are virologically suppressed (HIV-1 RNA less than 50 copies per mL) the recommended dosage is one 25 mg tablet once daily taken orally with a meal. Lower exposures of rilpivirine were observed during pregnancy, therefore viral load should be monitored closely.	The exposure of total RPV was approximately 30 to 40% lower during pregnancy compared with postpartum (6 to 12 weeks). Metabolized by CYP3A4. Rilpivirine is about 99.7% bound to plasma protein (albumin) during pregnancy, but there is a limited impact on the fraction of unbound rilpivirine.	Rilpivirine was well tolerated during pregnancy and postpartum. Rilpivirine exposure is substantially lowered during late pregnancy, but virologic suppression was maintained and no perinatal transmission was observed.	Edurant (rilpivirine hydrochloride) [package insert]. Titusville, NJ; Janssen Products, LP; 2022.	Osiyemi O, Yasin S, Zorrilla C, Bicer C, Hillewaert V, Brown K, Crauwels HM. Pharmacokinetics, Antiviral Activity, and Safety of Rilpivirine in Pregnant Women with HIV-1 Infection: Results of a Phase 3b, Multicenter, Open-Label Study. Infect Dis Ther. 2018 Mar;7(1):147-159. doi: 10.1007/s40121-017-0184-8.
somatropin	No change.	Not clinically relevent.	Yes	If 5 mg is needed, reconstitute with 0.9% sodium chloride injection or use the 10 mg benzyl alcohol-free formulation.	Further investigation is required.	There are no known adverse outcomes associated with fetal exposure to the preservative benzyl alcohol through maternal drug administration; however, the preservative benzyl alcohol can cause serious adverse events and death when administered intravenously to neonates and infants.	Zomacton (somatropin) [package insert]. Parsippany, NJ; Ferring Pharmaceuticals Inc.; 2018.
sotrovimab	Unknown. Further investigation is required.	Unknown. Further investigation is required.	No	No dosage adjustment is recommended in pregnant women.	Further investigation is required.	COVID-19 in pregnancy is associated with adverse maternal and fetal outcomes, including preeclampsia, eclampsia, preterm birth, premature rupture of membranes, venous thromboembolic disease, and fetal death.	Sotrovimab (sotrovimab) [package insert]. Philadelphia, PA; GlaxoSmithKline LLC; 2022.
tinzaparin sodium	↓ tinzaparin sodium	Unknown. Further investigation is required.	No	The recommended dose for the treatment of DVT with or without PE is 175 anti-Xa IU/kg of body weight, administered SC once daily for at least 6 days and until the patient is adequately anticoagulated with warfarin. No dosing adjustment is needed for pregnancy.	There is no clinically significant decrease in anti-Xa levels. Mean anti-Xa levels 4 hours post dose suggest that as pregnancy advances there is little or no influence on the pharmacokinetics of tinzaparin sodium. Increased clearance of tinzaparin sodium occurs in pregnancy.	Because benzyl alcohol may cross the placenta, tinzaparin sodium preserved with benzyl alcohol should be used with caution in pregnant women, use only if clearly needed. All patients receiving anticoagulants such as tinzaparin, including pregnant women, are at risk for bleeding. Pregnant women receiving tinzaparin should be carefully monitored for evidence of bleeding or excessive anticoagulation…	Innohep (tinzaparin sodium) [package insert]. Ballerup, Denmark; LEO Pharma Inc.; 2010.
vancomycin	Unknown. Further investigation is required.	Predominantly cleared via renal elimination. Likely no signficant difference in PK changes.	No	There is no oral dosing reccomendation for pregnant women, but not contraindicated.	The calculated geometric mean of AUC0-24 using the pregnant model (223 μg h/ml) is commensurate with the geometric mean of AUC0-24 calculated using the non-pregnant model (226 μg h/ml) suggesting that dosing regimens used for non-pregnant patients may also be applicable to pregnant patients. Systemic absorption of vancomycin is low following oral administration of vancomycin hydrochloride capsule…	There are no available data on vancomycin use in pregnant women to assess a risk of major birth defects or miscarriage. Available published data on intravenous vancomycin use in pregnancy during the second and third trimesters have not shown an association with adverse maternal or fetal outcomes.	Vancomycin (vancomycin) capsule [package insert]. Baudette, MN; ANI Pharmaceuticals, Inc.; 2022.	Goyal RK, Moffett BS, Gobburu JVS, Al Mohajer M. Population Pharmacokinetics of Vancomycin in Pregnant Women. Front Pharmacol. 2022 Jun 6;13:873439. doi: 10.3389/fphar.2022.873439.	Goyal RK, Moffett BS, Gobburu JVS, Al Mohajer M. Population Pharmacokinetics of Vancomycin in Pregnant Women. Front Pharmacol. 2022 Jun 6;13:873439. doi: 10.3389/fphar.2022.873439.
zidovudine	No change.	Eliminated via renal excretion and UGT2B7. No change in the PK parameters. Not clinically relevent.	No	100 mg orally 5 times per day until the start of labor. During labor and delivery, intravenous zidovudine should be administered at 2 mg per kg (total body weight) over 1 hour followed by a continuous intravenous infusion of 1 mg per kg per hour (total body weight) until clamping of the umbilical cord.	Zidovudine pharmacokinetics were similar to those of nonpregnant adults. UGT2B7 activity does not change during pregnancy, likely a reason why no dose adjustment is needed. Likely influenced by the transporter OAT1 and OAT3, but activity not likely to change during pregnancy. Consistent with passive transmission of the drug across the placenta, zidovudine concentrations in neonatal plasma at birt…	There have been reports of mild, transient elevations in serum lactate levels, which may be due to mitochondrial dysfunction, in neonates and infants exposed in utero or peri-partum to zidovudine-containing products. The clinical relevance of transient elevations in serum lactate is unknown. There have been few reports of developmental delay, seizures, and other neurological disease. However, a c…	Zidovudine (zidovudine) [package insert]. East Windsor, NJ; Aurobindo Pharma Limited; 2021.	O’Sullivan MJ, Boyer PJ, Scott GB, Parks WP, Weller S, Blum MR, Balsley J, Bryson YJ (1993) The pharmacokinetics and safety of zidovudine in the third trimester of pregnancy for women infected with human immunodeficiency virus and their infants: phase I acquired immunodeficiency syndrome clinical trials group study (protocol 082). Zidovudine Collaborative Working Group. Am J Obstet Gynecol 168(5)…	Isoherranen N, Thummel KE. Drug metabolism and transport during pregnancy: how does drug disposition change during pregnancy and what are the mechanisms that cause such changes? Drug Metab Dispos. 2013 Feb;41(2):256-62. doi: 10.1124/dmd.112.050245.
zinc acetate	Unknown. Further investigation is required.	Unknown. Further investigation is required.	Yes	25 mg t.i.d. is an effective dose in women who are pregnant as long as the patient is compliant with therapy. The dose can be raised to 50 mg t.i.d. if monitoring indicates a lessening of control.	Unknown. Further investigation is required.	No adverse effects on liver or neurological functions have been reported. Studies in pregnant women have not shown that zinc acetate increases the risk of fetal abnormalities if administered during all trimesters of pregnancy. Zinc acetate should be used during pregnancy only if clearly needed since harm cannot be completely ruled out. While zinc acetate should be used during pregnancy only if cl…	Galzin (zinc acetate) [package insert]. Parsippany, NJ; Teva Pharmaceuticals USA, Inc.; 2021.

## Sheet: Table 1B
Drug	Clinical impact of pregnancy on drug	Mechanism of Action	Dose Adjustment?	Intervention strategy	Evidence of interaction	Safety	Citation
atazanavir	↓ atazanavir	Likely due to increases in CYP3A4 activity. Further investigation is required.	Yes	Atazanavir sulfate 300 mg with ritonavir 100 mg may not provide sufficient exposure to atazanavir, especially when the activity of atazanavir or the whole regimen may be compromised due to drug resistance. Since there are limited data available and due to inter-patient variability during pregnancy, Therapeutic Drug Monitoring (TDM) may be considered to ensure adequate exposure. Following a possib…	Studies have found that there is an increase in clearance and volume of distribution in pregnant women who are taking atazanavir. Increased clearance likely due to increased metabolism via CYP3A4. Protein binding has been referenced as a possible additional cause, but plasma protein binding were similar across trimesters and postpartum. Decreased serum concentrations of atazanavir have been obser…	The risk of a further decrease in atazanavir exposure is expected when atazanavir is given with medicinal products known to reduce its exposure (e.g., tenofovir disoproxil or H2-receptorantagonists). If tenofovir disoproxil or an H2-receptor antagonist is needed, a dose increase to atazanavir sulfate 400 mg with ritonavir 100 mg with TDM may be considered. It is not recommended to use atazanavir …	Atazanavir Mylan (atazanavir) [package insert]. Mulhuddart, Dublin; Mylan Pharmaceuticals Limited; 2022.	Eley T, Bertz R, Hardy H, Burger D. Atazanavir pharmacokinetics, efficacy and safety in pregnancy: a systematic review. Antivir Ther. 2013;18(3):361-75. doi: 10.3851/IMP2473.	Salama E, Eke AC, Best BM, Mirochnick M, Momper JD. Pharmacokinetic Enhancement of HIV Antiretroviral Therapy During Pregnancy. J Clin Pharmacol. 2020 Dec;60(12):1537-1550. doi: 10.1002/jcph.1714.
atazanavir, cobicistat	↓ atazanavir ↓ cobicistat	Likely due to increases in CYP3A4 activity. Further investigation is required.	contraindicated	Treatment with atazanavir/cobicistat 300/150 mg during the second and third trimester has been shown to result in low atazanavir exposure. Cobicistat levels decrease and may not provide sufficient boosting. Therefore, therapy should not be initiated during pregnancy, and women who become pregnant during therapy should be switched to an alternative regimen.	Compared with paired postpartum data, atazanavir AUC0-24 was 26% lower in the second trimester and 54% lower in the third trimester, whereas cobicistat AUC0-24 was 35% lower in the second trimester and 52% lower in the third trimester.	The substantial reduction in atazanavir exposure may result in virological failure and an increased risk of mother to child transmission of HIV infection.	Evotaz (atazanavir, cobicistat) [package insert]. Dublin, Ireland; Bristol-Myers Squibb Pharma EEIG; 2022.	Momper JD, Wang J, Stek A, Shapiro DE, Powis KM, Paul ME, Badell ML, Browning R, Chakhtoura N, Denson K, Rungruengthanakit K, George K, Capparelli EV, Mirochnick M, Best BM; IMPAACT P1026s Protocol Team. Pharmacokinetics of Atazanavir Boosted With Cobicistat in Pregnant and Postpartum Women With HIV. J Acquir Immune Defic Syndr. 2022 Mar 1;89(3):303-309. doi: 10.1097/QAI.0000000000002856.
atosiban	No change.	Further investigation is required.	No	Atosiban should only be used when pre-term labor has been diagnosed between 24 and 33 completed weeks of gestation. Administered intravenously in three successive stages: an initial bolus dose (6.75 mg), performed with atosiban 6.75 mg/0.9 ml solution for injection, immediately followed by a continuous high dose infusion (loading infusion 300 micrograms/min) of atosiban 37.5 mg/5 ml concentrate f…	Pharmacokinetics are similar in pregnant and nonpregnant patients.	There is only limited clinical experience in the use of atosiban in multiple pregnancies or the gestational age group between 24 and 27 weeks, because of the small number of patients treated. The benefit of atosiban in these subgroups is therefore uncertain. Monitoring of uterine contractions and fetal heart rate during administration of atosiban and in case of persistent uterine contractions sho…	Tractocile (atosiban) [package insert]. Kastrup, Denmark; Ferring Pharmaceuticals A/S; 2022.	Goodwin TM, Millar L, North L, Abrams LS, Weglein RC, Holland ML. The pharmacokinetics of the oxytocin antagonist atosiban in pregnant women with preterm uterine contractions. Am J Obstet Gynecol. 1995 Sep;173(3 Pt 1):913-7. doi: 10.1016/0002-9378(95)90365-8.
cholic acid	Unknown. Further investigation is required.	Unknown. Further investigation is required.	Doctor will determine.	It is extremely important that pregnant women continue their therapy during pregnancy. As a precautionary measure, pregnant women and their unborn children should be closely monitored. If you become pregnant during treatment, your doctor will decide which treatment and dose is best in your situation.	Further investigation is required.	After the initiation period, serum and/or urine bile acids and liver parameters should be determined annually, at a minimum, and the dose adjusted accordingly. Additional or more frequent investigations should be undertaken to monitor therapy during pregnancy. Further investigation is required. There is a limited amount of data from the use of cholic acid in pregnant women. The exposed pregnancie…	Orphacol (cholic acid) [package insert]. Boulogne-Billancourt France; Laboratoires CTRS; 2021.
cobicistat	↓ cobicistat	Likely due to increases in CYP3A4 activity. Further investigation is required.	contraindicated	Treatment with cobicistat and atazanavir or darunavir during the second and third trimesters of pregnancy has been shown to result in lower atazanavir or darunavir exposure compared to postpartum. Therapy with cobicistat and atazanavir or darunavir should not be initiated during pregnancy, and women who become pregnant during therapy with cobicistat and atazanavir or darunavir should be switched …	For cobicistat, during the second and third trimesters of pregnancy, respectively, AUC24h was 63% and 49% lower, Cmax was 50% and 27% lower, and Cmin was 83% and 83% lower than in the postpartum period. The decrease in darunavir exposure during pregnancy was found to be more pronounced with darunavir/cobicistat compared with darunavir/ritonavir. Suggests an inadequate inhibition of CYP3A4 by cobi…	Cobicistat should not be used as a boosting agent in pregnancy.	Tybost (cobicistat) [package insert]. County Cork, Ireland; Gilead Sciences International Ltd; 2021.	Crauwels HM, Osiyemi O, Zorrilla C, Bicer C, Brown K. Reduced exposure to darunavir and cobicistat in HIV-1-infected pregnant women receiving a darunavir/cobicistat-based regimen. HIV Med. 2019 May;20(5):337-343. doi: 10.1111/hiv.12721.	Boyd SD, Sampson MR, Viswanathan P, Struble KA, Arya V, Sherwat AI. Cobicistat-containing antiretroviral regimens are not recommended during pregnancy: viewpoint. AIDS. 2019 May 1;33(6):1089-1093. doi: 10.1097/QAD.0000000000002163.
darunavir	↓ darunavir	Likely due to metabolism via CYP3A4. Further investigation required.	No	No dose adjustment is required for darunavir/ritonavir during pregnancy and postpartum. Darunavir/ritonavir should be used during pregnancy only if the potential benefit justifies the potential risk. In ART-experienced patients without DRV-RAMs* and who have plasma HIV-1 RNA < 100,000 copies/ml and CD4+ cell count ≥ 100 cells x 10^6/L a regimen of 800mg once daily with ritonavir 100 mg once daily…	Total darunavir exposures were generally lower during pregnancy compared to postpartum period. Likely a result of increased CYP3A4 metabolism. Ritonavir and darunavir biotransformation is mediated by CYP3A4. Changes in ritonavir exposure, resulting from pregnancy-induced CYP3A4 activity, results in altered darunavir CYP3A4/P-gp inhibition during pregnancy compared with non-pregnant women. Changes…	Treatment with darunavir/cobicistat 800/150 mg during pregnancy results in low darunavir exposure. Therefore, therapy with darunavir/cobicistat should not be initiated during pregnancy, and women who become pregnant during therapy should be switched to an alternative regimen.	Prezista (darunavir) [package insert]. Beerse, Belgium; Janssem- Cilag International NV; 2022.	Schalkwijk S, Ter Heine R, Colbers A, Capparelli E, Best BM, Cressey TR, Greupink R, Russel FGM, Moltó J, Mirochnick M, Karlsson MO, Burger DM. Evaluating darunavir/ritonavir dosing regimens for HIV-positive pregnant women using semi-mechanistic pharmacokinetic modelling. J Antimicrob Chemother. 2019 May 1;74(5):1348-1356. doi: 10.1093/jac/dky567.
darunavir, cobicistat	↓ darunavir ↓ cobicistat	Likely due to increases in CYP3A4 activity. Further investigation is required.	contraindicated	Treatment during pregnancy results in low darunavir exposure. Therapy should not be initiated during pregnancy, and women who become pregnant during therapy should be switched to an alternative regimen. Darunavir/ritonavir may be considered as an alternative.	Compared with paired postpartum data, darunavir AUC0--24 was 53% lower in the second trimester and 56% lower in the third trimester, whereas cobicistat AUC0--24 was 50% lower in the second trimester and 56% lower in the third trimester.	Standard darunavir/cobicistat dosing during pregnancy results in significantly lower exposure during pregnancy, which may increase the risk of virologic failure and perinatal transmission.	Rezolsta (darunavir, cobicistat) [package insert]. Beerse, Belgium; Janssen-Cilag International N.V.; 2022.	Momper JD, Wang J, Stek A, Shapiro DE, Scott GB, Paul ME, Febo IL, Burchett S, Smith E, Chakhtoura N, Denson K, Rungruengthanakit K, George K, Yang DZ, Capparelli EV, Mirochnick M, Best BM; IMPAACT P1026s Protocol Team. Pharmacokinetics of darunavir and cobicistat in pregnant and postpartum women with HIV. AIDS. 2021 Jul 1;35(8):1191-1199. doi: 10.1097/QAD.0000000000002857.
darunavir, cobicistat, emtricitabine, tenofovir al	↓ darunavir	Likely due to increases in CYP3A4 activity. Further investigation is required.	contraindicated	Treatment with darunavir/cobicistat during pregnancy results in low darunavir exposure. Therefore, therapy should not be initiated during pregnancy, and women who become pregnant during therapy should be switched to an alternative regimen. Treatment with darunavir/cobicistat 800/150 mg during the second and third trimester has been shown to result in low darunavir exposure, with a reduction of ar…	Compared with paired postpartum data, darunavir AUC0--24 was 53% lower in the second trimester and 56% lower in the third trimester, whereas cobicistat AUC0--24 was 50% lower in the second trimester and 56% lower in the third trimester. Emtricitabine is majorly excreted renally, but the changes do not warrant dose adjustment.	The substantial reduction in darunavir exposure may result in virological failure and an increased risk of mother to child transmission of HIV infection.	Symtuza (Darunavir, Cobicistat, Emtricitabine, and Tenofovir alafenamide) [package insert]. Latina, Italy; Janssen-Cilag International NV; 2022.	Momper JD, Wang J, Stek A, Shapiro DE, Scott GB, Paul ME, Febo IL, Burchett S, Smith E, Chakhtoura N, Denson K, Rungruengthanakit K, George K, Yang DZ, Capparelli EV, Mirochnick M, Best BM; IMPAACT P1026s Protocol Team. Pharmacokinetics of darunavir and cobicistat in pregnant and postpartum women with HIV. AIDS. 2021 Jul 1;35(8):1191-1199. doi: 10.1097/QAD.0000000000002857.	Abduljalil K, Badhan RKS. Drug dosing during pregnancy-opportunities for physiologically based pharmacokinetic models. J Pharmacokinet Pharmacodyn. 2020 Aug;47(4):319-340. doi: 10.1007/s10928-020-09698-w.
dolutegravir, rilpivirine	↓ dolutegravir ↓ rilpivirine	Likely due to increases in CYP3A4 activity. Further investigation is required.	contraindicated	Lower exposures of dolutegravir and rilpivirine were observed during pregnancy. No recommendations for dose adjustments can be made.	Median dolutegravir AUC0-24, Cmax and C24 were 25–51% lower in the second and third trimester compared to post partum. Rilpivirine is also highly bound to albumin (99.7%), which can influence the unbound concentration levels.	The safety and efficacy in pregnancy have not yet been established.	Juluca (dolutegravir, rilpivirine) [package insert]. Amersfoort, Netherlands; ViiV Healthcare B.V.; 2022.	Dowers E, Zamora F, Barakat LA, Ogbuagu O. Dolutegravir/rilpivirine for the treatment of HIV-1 infection. HIV AIDS (Auckl). 2018 Nov 2;10:215-224. doi: 10.2147/HIV.S157855.	Mulligan N, Best BM, Wang J, Capparelli EV, Stek A, Barr E, Buschur SL, Acosta EP, Smith E, Chakhtoura N, Burchett S, Mirochnick M; IMPAACT P1026s Protocol Team. Dolutegravir pharmacokinetics in pregnant and postpartum women living with HIV. AIDS. 2018 Mar 27;32(6):729-737. doi: 10.1097/QAD.0000000000001755.
elvitegravir, cobicistat, emtricitabine, tenofovir	↓ elvitegravir ↓ cobicistat	Both decreases in drug concentrations are likely due to metabolism via CYP3A4, but further investigation is required.	Yes	Treatment with cobicistat and elvitegravir during pregnancy results in lower elvitegravir exposure. Cobicistat levels decrease and may not provide sufficient boosting. Therapy should not be initiated during pregnancy, and women who become pregnant during therapy should be switched to an alternative regimen.	Compared to paired postpartum data, elvitegravir AUC0–24 was 24% lower in the second trimester and 44% lower in the third trimester, while cobicistat AUC0–24 was 44% lower in the second trimester and 59% lower in the third trimester. Emtricitabine is majorly excreted renally, but the changes do not warrant dose adjustment. Elvitegravir is also highly protein bound to albumin, which could potentia…	The substantial reduction in elvitegravir exposure may result in virological failure and an increased risk of mother-to-child transmission of HIV infection.	Stribild (elvitegravir, cobicistat, emtricitabine, and tenofovir disoproxil fumarate) [package insert]. County Cork, Ireland; Gilead Sciences International Ltd; 2021.	Momper JD, Best BM, Wang J, Capparelli EV, Stek A, Barr E, Badell ML, Acosta EP, Purswani M, Smith E, Chakhtoura N, Park K, Burchett S, Shapiro DE, Mirochnick M; IMPAACT P1026s Protocol Team. Elvitegravir/cobicistat pharmacokinetics in pregnant and postpartum women with HIV. AIDS. 2018 Nov 13;32(17):2507-2516. doi: 10.1097/QAD.0000000000001992.	Abduljalil K, Badhan RKS. Drug dosing during pregnancy-opportunities for physiologically based pharmacokinetic models. J Pharmacokinet Pharmacodyn. 2020 Aug;47(4):319-340. doi: 10.1007/s10928-020-09698-w.
emtricitabine, rilpivirine, tenofovir disoproxil	↓ rilpivirine	Rilpivirine decrease in concentration likely due to increases in CYP3A4 activity. Further investigation is required.	Yes	Lower exposures of rilpivirine were observed during pregnancy, therefore viral load should be monitored closely. Alternatively, switching to another ART regimen could be considered.	Total rilpivirine exposure was 29–31% lower during pregnancy versus postpartum. Emtricitabine is majorly excreted renally, but the changes do not warrant dose adjustment.	Lower rilpivirine exposure, similar to that seen during pregnancy, has been associated with an increased risk of virological failure.	Eviplera (emtricitabine, rilpivirine, tenofovir disoproxil) [package insert]. County Cork, Ireland; Gilead Sciences International Ltd; 2021.	Osiyemi O, Yasin S, Zorrilla C, Bicer C, Hillewaert V, Brown K, Crauwels HM. Pharmacokinetics, Antiviral Activity, and Safety of Rilpivirine in Pregnant Women with HIV-1 Infection: Results of a Phase 3b, Multicenter, Open-Label Study. Infect Dis Ther. 2018 Mar;7(1):147-159. doi: 10.1007/s40121-017-0184-8.	Abduljalil K, Badhan RKS. Drug dosing during pregnancy-opportunities for physiologically based pharmacokinetic models. J Pharmacokinet Pharmacodyn. 2020 Aug;47(4):319-340. doi: 10.1007/s10928-020-09698-w.
lopinavir, ritonavir	↓ lopinavir ↓ ritonavir	Likely due to increases in CYP3A4 activity. Further investigation is required.	No	No dose adjustment is required for lopinavir/ritonavir during pregnancy and postpartum. Once daily administration of lopinavir/ritonavir is not recommended for pregnant women due to the lack of pharmacokinetic and clinical data.	Population pharmacokinetic analysis estimated 17% higher lopinavir clearance in pregnant women than in nonpregnant subjects. Lopinavir clearance values postpartum were 26.4% and 37.1% lower than in nonpregnant subjects and pregnant women, respectively.	Further investigation is required.	Lopinavir/Ritonavir Mylan (lopinavir, ritonavir) [package insert]. Dublin, Ireland; Mylan Pharmaceuticals Limited; 2020.	Salem AH, Jones AK, Santini-Oliveira M, Taylor GP, Patterson KB, Nilius AM, Klein CE. No Need for Lopinavir Dose Adjustment during Pregnancy: a Population Pharmacokinetic and Exposure-Response Analysis in Pregnant and Nonpregnant HIV-Infected Subjects. Antimicrob Agents Chemother. 2015 Nov 2;60(1):400-8. doi: 10.1128/AAC.01197-15.
rilpivirine	↓ rilpivirine	Likely due to increases in CYP3A4 activity. Further investigation is required.	Yes	Lower exposures of rilpivirine were observed during pregnancy, therefore viral load should be monitored closely. Alternatively, switching to another ART regimen could be considered.	Total rilpivirine exposure was 29–31% lower during pregnancy versus postpartum.	Lower rilpivirine exposure, similar to that seen during pregnancy, has been associated with an increased risk of virological failure.	Edurant (rilpivirine hydrochloride) [package insert]. Latina, Italy; Janssen-Cilag International N.V.; 2021.	Osiyemi O, Yasin S, Zorrilla C, Bicer C, Hillewaert V, Brown K, Crauwels HM. Pharmacokinetics, Antiviral Activity, and Safety of Rilpivirine in Pregnant Women with HIV-1 Infection: Results of a Phase 3b, Multicenter, Open-Label Study. Infect Dis Ther. 2018 Mar;7(1):147-159. doi: 10.1007/s40121-017-0184-8.
zinc	Unknown. Further investigation is required.	Unknown. Further investigation is required. Zinc induces intestinal cell metallothionein, which binds copper and prevents its transfer into blood.	Yes	A dose of 25 mg 3 times daily is usually effective but the dose should be adjusted to copper levels. Overtreatment with anti-copper agents carries the risk of copper deficiency, which is harmful for pregnant women since copper is required for proper growth and mental development. Urinary copper levels should be kept a little above the upper limit of normal or in the high normal range (i.e. 40 – 5…	Further investigation is required.	Laboratory follow-up including hematological surveillance and lipoproteins determination should be performed in order to detect early manifestations of copper deficiency, such as anemia and/or leukopenia resulting from bone marrow depression, and decrease in HDL cholesterol and HDL/total cholesterol ratio. Data on a limited number of exposed pregnancies in patients with Wilson’s disease give no i…	Wilzin (zinc) [package insert]. Puteaux, France; Recordati Rare Diseases; 2019.

## Sheet: Table 2
Drug	Recommendation	Reason for Recommendation	Safety Considerations	Pharmacokinetic Evidence for possible dose adjustment	References
abacavir sulfate, dolutegravir sodium, lamivudine	Contraindicated.	May cause fetal harm. Embryo-fetal toxicity may occur when used at the time of conception and in early pregnancy.	Assess the risks and benefits and discuss with the patient to determine if an alternative treatment should be considered at the time of conception through the first trimester of pregnancy or if pregnancy is confirmed in the first trimester due to the risk of neural tube defects.	This evidence is derived from a study containing 20 pregnant participants. Lamivudine's major elimination pathway is renal, but no dose adjustment is warranted. Likely influenced by OAT1, but the activity is not likely to change during pregnancy. Further investigation is required. This evidence is derived from a study containing 14 pregnant participants. Abacavir pharmacokinetics of abacavir 600 …	Triumeq (abacavir sulfate, dolutegravir sodium, lamivudine) [package insert]. Research Triangle Park, NC; GlaxoSmithKline; 2022.	Isoherranen N, Thummel KE. Drug metabolism and transport during pregnancy: how does drug disposition change during pregnancy and what are the mechanisms that cause such changes? Drug Metab Dispos. 2013 Feb;41(2):256-62. doi: 10.1124/dmd.112.050245.	Moodley J, Moodley D, Pillay K, Coovadia H, Saba J, van Leeuwen R, Goodwin C, Harrigan PR, Moore KH, Stone C, Plumb R, Johnson MA. Pharmacokinetics and antiretroviral activity of lamivudine alone or when coadministered with zidovudine in human immunodeficiency virus type 1-infected pregnant women and their offspring. J Infect Dis. 1998 Nov;178(5):1327-33. doi: 10.1086/314431.	Schalkwijk S, Colbers A, Konopnicki D, Weizsäcker K, Moltó J, Tenorio CH, Hawkins D, Taylor G, Wood C, van der Ende M, Burger D; PANNA network. The pharmacokinetics of abacavir 600 mg once daily in HIV-1-positive pregnant women. AIDS. 2016 May 15;30(8):1239-44. doi: 10.1097/QAD.0000000000001046.
atazanavir and cobicistat	Contraindicated.	Pharmacokinetic data from studies conducted in pregnant individuals receiving cobicistat showed substantially lower exposures during the second and third trimesters, and consequently also for the coadministered antiretroviral agent.	Prospective pregnancy data from the APR are not sufficient to adequately assess the risk of birth defects or miscarriage. Reports of lactic acidosis syndrome, sometimes fatal, and symptomatic hyperlactatemia have occurred in pregnant individuals using atazanavir in combination with nucleoside analogues, which are associated with an increased risk of lactic acidosis syndrome.	This evidence is derived from a study containing 11 pregnant patients. Standard atazanavir/cobicistat dosing during pregnancy results in lower exposure which increases the risk of virologic failure and perinatal transmission. The elimination of both atazanavir and cobicistat is primarily by CYP3A-mediated metabolism. Cobicistat AUC0-24 was 35% lower during the second trimester and 52% lower durin…	Evotaz (atazanavir and cobicistat) [package insert]. Princeton, NJ; Bristol-Myers Squibb Company; 2022.	Momper JD, Wang J, Stek A, Shapiro DE, Powis KM, Paul ME, Badell ML, Browning R, Chakhtoura N, Denson K, Rungruengthanakit K, George K, Capparelli EV, Mirochnick M, Best BM; IMPAACT P1026s Protocol Team. Pharmacokinetics of Atazanavir Boosted With Cobicistat in Pregnant and Postpartum Women With HIV. J Acquir Immune Defic Syndr. 2022 Mar 1;89(3):303-309. doi: 10.1097/QAI.0000000000002856.
bupivacaine hydrochloride	Bupivacaine Hydrochloride Injection 0.75% (7.5 mg/mL) is not recommended for nonobstetrical surgical procedures in pregnant patients.	There are no adequate and well-controlled studies in pregnant women. Bupivacaine hydrochloride should be used during pregnancy only if the potential benefit justifies the potential risk to the fetus. Experience with nonobstetrical surgical procedures in pregnant patients is not sufficient to recommend use of 0.75% concentration of bupivacaine hydrochloride in these patients.	Local anesthetics rapidly cross the placenta, and when used for epidural, caudal, or pudendal block anesthesia, can cause varying degrees of maternal, fetal, and neonatal toxicity.	This evidence is derived from 35 pregnant patients. There is evidence that intrathecal bupivacaine was 1.14 times more potent for motor block in pregnant versus non-pregnant women, although further investigation is needed since this study was performed in relation to a obstetrical surgical procedure.	Bupivicaine Hydrochloride (bupivicaine hydrochloride) [package insert]. Mukilteo, WA; HF Acquisition Co LLC, DBA HealthFirst; 2020.	Zhan Q, Huang S, Geng G, Xie Y. Comparison of relative potency of intrathecal bupivacaine for motor block in pregnant versus non-pregnant women. Int J Obstet Anesth. 2011 Jul;20(3):219-23. doi: 10.1016/j.ijoa.2011.01.001.
bupropion hydrochloride	Ask a health professional before use.	Use only if benefit outweighs potential risk to the fetus.	Data from epidemiological studies of pregnant women exposed to bupropion in the first trimester indicate no increased risk of congenital malformations overall. Consider the risks of untreated depression when discontinuing or changing treatment with antidepressant medications during pregnancy and postpartum.	This evidence is derived from a study containing 8 pregnant patients. Bupropion is metabolized by CYP2B6, CYP2C19, and CYP3A4. Research has displayed no clinically meaningful differences in the pharmacokinetics. Dose adjustment may not be necessary. Further investigation is required.	Bupropion (bupropion hydrochloride) [pakcage insert]. Cranbury, NJ; Northwind Pharmaceuticals; 2022.	Fay EE, Czuba LC, Sager JE, Shum S, Stephenson-Famy A, Isoherranen N. Pregnancy Has No Clinically Significant Effect on the Pharmacokinetics of Bupropion or Its Metabolites. Ther Drug Monit. 2021 Dec 1;43(6):780-788. doi: 10.1097/FTD.0000000000000885.
carbamazepine	The prescribing physician should weigh the benefits of against the risks in treating women of childbearing potential. If this drug is used during pregnancy, or if the patient becomes pregnant while taking this drug, the patient should be apprised of the potential hazard to the fetus.	Can cause fetal harm when administered to a pregnant woman. Transplacental passage of carbamazepine is rapid (30-60 minutes), and the drug is accumulated in the fetal tissues, with higher levels found in liver and kidney than in brain and lung.	Data suggests there may be an association between the use of carbamazepine and congenital malformations, including spina bifida. In cases where the severity and frequency of the seizure disorder are such that removal of medication does not pose a serious threat to the patient, discontinuation of the drug may be considered prior to and during pregnancy, although it cannot be said that minor seizur…	This evidence is derived from a study containing 6 pregnant participants. If the decision is made to continue carbamazepine treatment, there may be a need to slightly increase the dose or monitor the serum concentrations due to an increase in clearance. Likely, this increase in clearance is due to metabolism via CYP3A4. Although, the changes are thought to be slight and likely are clincally irrel…	Carbamazepine (carbamazepine) [package insert]. Miami, FL; Atlantic Biologicals Corp.; 2021.	Johnson EL, Stowe ZN, Ritchie JC, Newport DJ, Newman ML, Knight B, Pennell PB. Carbamazepine clearance and seizure stability during pregnancy. Epilepsy Behav. 2014 Apr;33:49-53. doi: 10.1016/j.yebeh.2014.02.011.
citalopram	Should be used during pregnancy only if the potential benefit justifies the potential risk to the fetus. This decision can only be made on a case by case basis.	There are no adequate and well-controlled studies in pregnant women.	Infants exposed to SSRIs in pregnancy may have an increased risk for persistent pulmonary hypertension of the newborn (PPHN). PPHN occurs in 1-2 per 1,000 live births in the general population and is associated with substantial neonatal morbidity and mortality.	This evidence is derived from a study containing 10 pregnant participants. If the decision is made to treat during pregnancy, a small decrease in serum concentrations may occur during the 3rd trimester. Further investigation is needed, but it would be suggested to use TDM to guide dose-adjustment when necessary. Changes likely due to metabolism via CYP2C19, CYP3A4 and CYP2D6. Further investigatio…	Citalopram (citalopram) [package insert]. Indiana, PA; Remedyrepack Inc.; 2022.	Schoretsanitis G, Spigset O, Stingl JC, Deligiannidis KM, Paulzen M, Westin AA. The impact of pregnancy on the pharmacokinetics of antidepressants: a systematic critical review and meta-analysis. Expert Opin Drug Metab Toxicol. 2020 May;16(5):431-440. doi: 10.1080/17425255.2020.1750598.	Mrazek DA, Biernacka JM, O'Kane DJ, Black JL, Cunningham JM, Drews MS, Snyder KA, Stevens SR, Rush AJ, Weinshilboum RM. CYP2C19 variation and citalopram response. Pharmacogenet Genomics. 2011 Jan;21(1):1-9. doi: 10.1097/fpc.0b013e328340bc5a.	Heikkinen T, Ekblad U, Kero P, Ekblad S, Laine K. Citalopram in pregnancy and lactation. Clin Pharmacol Ther. 2002 Aug;72(2):184-91. doi: 10.1067/mcp.2002.126181.
cobicistat	Contraindicated.	Cobicistat coadministered with darunavir or atazanavir is not recommended during pregnancy. Cobicistat coadministered with darunavir is not recommended for use during pregnancy because of substantially lower exposures of darunavir and cobicistat during the second and third trimesters. Cobicistat coadministered with atazanavir is not recommended for use during pregnancy because of substantially lo…	Substatially lower exposure to the antiretroviral agents can translate to lack of virologic suppression.	This evidence is derived from a study containing 29 pregnant women. The metabolism of cobicistat is primarily performed by CYP3A4 and minorly by CYP2D6, which likely contributes to the decreased exposure. Cobicistat is used on a pharmacokinetic enhancer to inhibit CYP3A4 metabolism of antiretrovirals, so with decreased concentrations of cobicisat it was less equipped to increase antiretroviral co…	Tybost (cobicistat) [package insert]. Foster City, CA; Gilead Sciences, Inc.; 2021.	Momper JD, Best BM, Wang J, Capparelli EV, Stek A, Barr E, Badell ML, Acosta EP, Purswani M, Smith E, Chakhtoura N, Park K, Burchett S, Shapiro DE, Mirochnick M; IMPAACT P1026s Protocol Team. Elvitegravir/cobicistat pharmacokinetics in pregnant and postpartum women with HIV. AIDS. 2018 Nov 13;32(17):2507-2516. doi: 10.1097/QAD.0000000000001992.	Eke AC, Mirochnick M. Ritonavir and cobicistat as pharmacokinetic enhancers in pregnant women. Expert Opin Drug Metab Toxicol. 2019;15(7):523-525.
darunavir, cobicistat, and ethanolate	Contraindicated.	Not recommended during pregnancy due to substantially lower exposures of darunavir and cobicistat during the second and third trimesters of pregnancy.	An alternative regimen is recommended for those who become pregnant during therapy. Available data from the APR show no statistically significant difference in the overall risk of major birth defects for darunavir and cobicistat compared with the background rate for major birth defects of 2.7% in a U.S. reference population of the Metropolitan Atlanta Congenital Defects Program (MACDP). Low darun…	This evidence is derived from a study containing 29 pregnant women. Plasma exposures of cobicistat are reduced by approximately 44-54% in the second and third trimester. When cobicistat is used with antiretrovirals, the antiretroviral drug exposures are significantly lower, resulting in subclinical therapy. Likely due to increased metabolism via CYP3A4, further investigation is required.	Prezcobix (Darunavir, cobicistat, and ethanolate) [package insert]. Titusville NJ; Janssen Products LP; 2022.	Momper JD, Wang J, Stek A, Shapiro DE, Scott GB, Paul ME, Febo IL, Burchett S, Smith E, Chakhtoura N, Denson K, Rungruengthanakit K, George K, Yang DZ, Capparelli EV, Mirochnick M, Best BM; IMPAACT P1026s Protocol Team. Pharmacokinetics of darunavir and cobicistat in pregnant and postpartum women with HIV. AIDS. 2021 Jul 1;35(8):1191-1199. doi: 10.1097/QAD.0000000000002857.	Eke AC, Mirochnick M. Ritonavir and cobicistat as pharmacokinetic enhancers in pregnant women. Expert Opin Drug Metab Toxicol. 2019;15(7):523-525.
dolutegravir sodium	Contraindicated.	May cause fetal harm. Embryo-fetal toxicity may occur when used at the time of conception and in early pregnancy.	Assess the risks and benefits and discuss with the patient to determine if an alternative treatment should be considered at the time of conception through the first trimester of pregnancy or if pregnancy is confirmed in the first trimester due to the risk of neural tube defects.	This evidence is derived from a study containing 29 pregnant participants. Dolutegravir exposure is lower in pregnancy compared to post-partum patients with once-daily dosing. As with most HIV-integrase inhibitors, dolutegravir is a P-gp substrate and therefore absorption may be decreased due to increased intestinal P-gp expression during pregnancy. Dolutegravir is primarily metabolized by UGT1A1…	Tivicay (dolutegravir sodium) [package insert]. Indiana, PA; RemedyRepack, Inc. 2022.	van der Galiën R, Ter Heine R, Greupink R, Schalkwijk SJ, van Herwaarden AE, Colbers A, Burger DM. Pharmacokinetics of HIV-Integrase Inhibitors During Pregnancy: Mechanisms, Clinical Implications and Knowledge Gaps. Clin Pharmacokinet. 2019 Mar;58(3):309-323. doi: 10.1007/s40262-018-0684-z.	Mulligan N, Best BM, Wang J, Capparelli EV, Stek A, Barr E, Buschur SL, Acosta EP, Smith E, Chakhtoura N, Burchett S, Mirochnick M; IMPAACT P1026s Protocol Team. Dolutegravir pharmacokinetics in pregnant and postpartum women living with HIV. AIDS. 2018 Mar 27;32(6):729-737. doi: 10.1097/QAD.0000000000001755.
doxorubicin hydrochloride	Contraindicated.	Can cause fetal harm, women should be advised on the potential harm.	Advise female patients of reproductive potential to use highly effective contraception during treatment with doxorubicin and for 6 months after treatment.	This evidence is derived from studies containing 7 pregnant participants and 22 pregnant participants.. Significantly lower clearance has been reported in pregnant women, which resulted in lower exposure in pregnant women compared with non-pregnant patients. The changes in PK is not likely to warrant dose adjustment. further investigation is required.	Adriamycin (doxorubicin hydrochloride) [package insert]. Eatontown, NJ; Hikma Pharmaceuticals USA Inc.; 2019.	Ryu RJ, Eyal S, Kaplan HG, Akbarzadeh A, Hays K, Puhl K, Easterling TR, Berg SL, Scorsone KA, Feldman EM, Umans JG, Miodovnik M, Hebert MF. Pharmacokinetics of doxorubicin in pregnant women. Cancer Chemother Pharmacol. 2014 Apr;73(4):789-97. doi: 10.1007/s00280-014-2406-z.	Janssen JM, Van Calsteren K, Dorlo TPC, Halaska MJ, Fruscio R, Ottevanger P, Schröder CP, Boere I, Witteveen PO, Painter RC, Bekkers R, Drochytek V, Beijnen JH, Huitema ADR, Amant FCH. Population Pharmacokinetics of Docetaxel, Paclitaxel, Doxorubicin and Epirubicin in Pregnant Women with Cancer: A Study from the International Network of Cancer, Infertility and Pregnancy (INCIP). Clin Pharmacokine…
efavirenz, emtricitabine, and tenofovir disoproxil fumarate (TDF)	Contraindicated.	Fetal harm may occur when administered to a pregnant woman during the first trimester.	Efavirenz may cause fetal harm when administered during the first trimester of pregnancy.	This evidence is derived from studies containing 25 pregnant participants and 42 pregnant participants. If the decision is made to treat during pregnancy, no dose adjustment seems to be required with efavirenz. Although oral clearance increased and trough concentrations decreased during the third trimester, the viral load suppression remained sufficient to prevent the transfer of HIV from mother …	Atripla (efavirenz, emtricitabine, and tenofovir disoproxil fumarate) [package insert]. Indiana, PA; Remedy Repack, Inc.; 2022.	Cressey TR, Stek A, Capparelli E, Bowonwatanuwong C, Prommas S, Sirivatanapa P, Yuthavisuthi P, Neungton C, Huo Y, Smith E, Best BM, Mirochnick M, Team IP (2012) Efavirenz pharmacokinetics during the third trimester of pregnancy and postpartum. J Acquir Immune Defic Syndr 59(3):245–252. https://doi.org/10.1097/QAI.0b013e31823ff052	Olagunju A, Bolaji O, Amara A, Else L, Okafor O, Adejuyigbe E, Oyigboja J, Back D, Khoo S, Owen A (2015) Pharmacoge- netics of pregnancy-induced changes in efavirenz pharmacoki- netics. Clin Pharmacol Ther 97(3):298–306. https://doi.org/10. 1002/cpt.43	Kreitchmann R, Schalkwijk S, Best B, Wang J, Colbers A, Stek A, Shapiro D, Cressey T, Mirochnick M, Burger D. Efavirenz pharmacokinetics during pregnancy and infant washout. Antivir Ther. 2019;24(2):95-103. doi: 10.3851/IMP3283.	Eke AC, Shoji K, Best BM, Momper JD, Stek AM, Cressey TR, Mirochnick M, Capparelli EV. Population Pharmacokinetics of Tenofovir in Pregnant and Postpartum Women Using Tenofovir Disoproxil Fumarate. Antimicrob Agents Chemother. 2021 Feb 17;65(3):e02168-20. doi: 10.1128/AAC.02168-20.	Stek AM, Best BM, Luo W, Capparelli E, Burchett S, Hu C, Li H, Read JS, Jennings A, Barr E, Smith E, Rossi SS, Mirochnick M. Effect of pregnancy on emtricitabine pharmacokinetics. HIV Med. 2012 Apr;13(4):226-35. doi: 10.1111/j.1468-1293.2011.00965.x. Epub 2011 Nov 30.
elvitegravir, cobicistat, emtricitabine, and tenofovir alafenamide	Contraindicated.	Not recommended for use during pregnancy because of substantially lower exposures of cobicistat and elvitegravir during the second and third trimesters of pregnancy.	Lower exposures mean that women may not be virologically suppressed.	This evidence is derived from a study containing 30 pregnant patients. Standard elvitegravir and cobicistat dosing during pregnancy results in significantly lower exposure, likely due to the metabolism of both elvitegravir and cobicistat being performed primarily by CYP3A. This may increase the risk of virologic failure and mother-to-child transmission. Further investigation is required to discov…	Genvoya (elvitegravir, cobicistat, emtricitabine, and tenofovir alafenamide) [package insert]. Foster City, CA; Gilead Sciences, Inc.; 2022.	Momper JD, Best BM, Wang J, Capparelli EV, Stek A, Barr E, Badell ML, Acosta EP, Purswani M, Smith E, Chakhtoura N, Park K, Burchett S, Shapiro DE, Mirochnick M; IMPAACT P1026s Protocol Team. Elvitegravir/cobicistat pharmacokinetics in pregnant and postpartum women with HIV. AIDS. 2018 Nov 13;32(17):2507-2516. doi: 10.1097/QAD.0000000000001992.
epirubicin hydrochloride	Contraindicated. May cause fetal harm when administered to a pregnant woman; avoid use during the 1st trimester.	There are reports of fetal and/or neonatal cardiotoxicity following in utero exposure to epirubicin.	Available human data do not establish the presence or absence of major birth defects and miscarriage related to the use of epirubicin during the 2nd and 3rd trimesters. Advise male patients with pregnant partners to use condoms during treatment and for at least 7 days after the last dose.	This evidence is derived from a study containing 16 pregnant patients. Epirubicin is primarily metabolized by CYP3A4 as well as UGT2B7, but there was no significant clinically relevent change in clearance with epirubicin. There have been observed increases in Vd, moderate protein binding and slight decreased systemic drug exposure. It is currently advised to administer a similar dose of epirubici…	Ellence (epirubicin hydrochloride) [package insert]. New York, NY; Pharmacia & Upjohn Company LLC; 2021.	Janssen JM, Van Calsteren K, Dorlo TPC, Halaska MJ, Fruscio R, Ottevanger P, Schröder CP, Boere I, Witteveen PO, Painter RC, Bekkers R, Drochytek V, Beijnen JH, Huitema ADR, Amant FCH. Population Pharmacokinetics of Docetaxel, Paclitaxel, Doxorubicin and Epirubicin in Pregnant Women with Cancer: A Study from the International Network of Cancer, Infertility and Pregnancy (INCIP). Clin Pharmacokine…
escitalopram	Use only if the potential benefit justifies the potential risk to the fetus.	When treating a pregnant woman with escitalopram, the physician should carefully consider both the potential risks of taking an SSRI, along with the established benefits of treating depression with an antidepressant. This decision can only be made on a case by case basis.	Neonates exposed to escitalopram and other SSRIs or serotonin and norepinephrine reuptake inhibitors (SNRIs), late in the third trimester have developed complications requiring prolonged hospitalization, respiratory support and tube feeding. Infants exposed to SSRIs in pregnancy may have an increased risk for persistent pulmonary hypertension of the newborn (PPHN).	This evidence is derived from a study containing 97 pregnant participants. If the decision is made to treat during the 3rd trimester of pregnancy, the small increase of around 10% in serum concentrations during the 3rd trimester are considered likely to be clinically irrelevent. Likely due to CYP2C19, CYP2D6, and CYP3A4 metabolism. Further investigation is required.	Escitalopram Oxalate (escitalopram) [package insert]. Boca Raton, FL; Exelan Pharmaceuticals, Inc.; 2021.	Schoretsanitis G, Spigset O, Stingl JC, Deligiannidis KM, Paulzen M, Westin AA. The impact of pregnancy on the pharmacokinetics of antidepressants: a systematic critical review and meta-analysis. Expert Opin Drug Metab Toxicol. 2020 May;16(5):431-440. doi: 10.1080/17425255.2020.1750598.	Westin AA, Brekke M, Molden E, Skogvoll E, Spigset O (2017) Selective serotonin reuptake inhibitors and venlafaxine in pregnancy: Changes in drug disposition. PLoS ONE 12(7):e0181082. https://doi.org/10.1371/journal.pone.0181082
fluoxetine hydrochloride	When treating a pregnant woman with fluoxetine, the physician should carefully consider both the potential risks of taking an SSRI, along with the established benefits of treating depression with an antidepressant. The decision can only be made on a case by case basis.	There are no adequate and well-controlled clinical studies on the use of fluoxetine in pregnant women. Studies assessing the risk of fluoxetine exposure during the first trimester of pregnancy have demonstrated inconsistent results.	Infants exposed to SSRIs in pregnancy may have an increased risk for persistent pulmonary hypertension of the newborn (PPHN). Neonates exposed to SSRIs or SNRIs late in the third trimester have developed complications requiring prolonged hospitalization, respiratory support, and tube feeding.	This evidence is derived from a study containing 58 pregnant participants. If the decision is made to treat during pregnancy, the small decrease in serum concentrations during the 3rd trimester is considered to be likely clinically irrelevent. Likely a result of CYP2D6 induction. Also minorly metabolized by CYP2C9 and CYP2C19. Further investigation is required.	Fluoxetine Hydrochloride (fluoxetine hydrochloride) [package insert]. Burbank, CA; Bryant Ranch Prepack; 2022.	Schoretsanitis G, Spigset O, Stingl JC, Deligiannidis KM, Paulzen M, Westin AA. The impact of pregnancy on the pharmacokinetics of antidepressants: a systematic critical review and meta-analysis. Expert Opin Drug Metab Toxicol. 2020 May;16(5):431-440. doi: 10.1080/17425255.2020.1750598.	Westin AA, Brekke M, Molden E, Skogvoll E, Spigset O (2017) Selective serotonin reuptake inhibitors and venlafaxine in pregnancy: Changes in drug disposition. PLoS ONE 12(7):e0181082. https://doi.org/10.1371/journal.pone.0181082
fluvoxamine maleate	Consider the risk of untreated depression when discontinuing or changing treatment with antidepressant medication during pregnancy and postpartum.	Third trimester use may increase risk for persistent pulmonary hypertension and symptoms of poor adaptation (respiratory distress, temperature instability, feeding difficulty, hypotonia, tremor, irritability) in the neonate.	Exposure during late pregnancy to SSRIs may have an increased risk for persistent pulmonary hypertension of the newborn.	This evidence is derived from a study containing 3 pregnant participants. Prominent decrease in serum concentration levels during the 3rd trimester. Likely due to metabolism via CYP2D6, CYP1A2, CYP2C19, and CYP3A4. If the decision is made to treat during pregnancy, dose increase of about 100% during the third trimester in order to maintain stable concentrations. Further investigation is required.	Fluvoxamine maleate (fluvoxamine maleate) [package insert]. Indiana, PA; Remedyrepack, Inc.; 2022.	Westin AA, Brekke M, Molden E, Skogvoll E, Spigset O (2017) Selective serotonin reuptake inhibitors and venlafaxine in pregnancy: Changes in drug disposition. PLoS ONE 12(7):e0181082. https://doi.org/10.1371/journal.pone.0181082
glipizide and metformin hydrochloride	Contraindicated.	There are no adequate and well-controlled studies in pregnant women with glipizide and metformin hydrochloride tablets or their individual components. If used, glipizide and metformin hydrochloride tablets should be discontinued at least 1 month before the expected delivery date.	Recent information strongly suggests that abnormal blood glucose levels during pregnancy are associated with a higher incidence of congenital abnormalities. Most experts recommend that insulin be used during pregnancy to maintain blood glucose as close to normal as possible.	This evidence is derived from a study containing 12 pregnant participants and another containing 37 pregnant participants. If the decision is made to treat with metformin during pregnancy, there is likely no need for a dose adjustment. There is an increase in renal clearance and volume of distribution but the change is clinically irrelevent. Metformin is also likely influenced by the transporter …	Glipizide and Metformin Hydrochloride (glipizide and metformin hydrochloride) [package insert]. Parsippany, NJ; Teva Pharmaceuticals USA, Inc.; 2022.	Eyal S, Easterling TR, Carr D, Umans JG, Miodovnik M, Hankins GD, Clark SM, Risler L, Wang J, Kelly EJ, Shen DD, Hebert MF. Pharmacokinetics of metformin during pregnancy. Drug Metab Dispos. 2010 May;38(5):833-40. doi: 10.1124/dmd.109.031245. Epub 2010 Jan 29.	Charles B, Norris R, Xiao X, Hague W (2006) Population pharmacokinetics of metformin in late pregnancy. Ther Drug Monit 28(1):67–72. https://doi.org/10.1097/01.ftd.0000184161. 52573.0e	Isoherranen N, Thummel KE. Drug metabolism and transport during pregnancy: how does drug disposition change during pregnancy and what are the mechanisms that cause such changes? Drug Metab Dispos. 2013 Feb;41(2):256-62. doi: 10.1124/dmd.112.050245.
glyburide	Contraindicated.	There are no adequate and well-controlled studies in pregnant women.	If glyburide is used during pregnancy, it should be discontinued at least two weeks before the expected delivery date. Because recent information suggests that abnormal blood glucose levels during pregnancy are associated with a higher incidence of congenital abnormalities, many experts recommend that insulin be used during pregnancy to maintain blood glucose levels as close to normal as possible.	This evidence is derived from a study containing 8 pregnant patients with Type 2 diabetes and 18 pregnant patients with gestational diabetes. More than twice the dose is needed to achieve a plasma concentration in pregnant women comparable to the concentration achieved in nonpregnant women. This evidence is derived from a study containing 40 pregnant patients with Gestational Diabetes Mellitus an…	Glyburide (glyburide) [package insert]. Oklahoma City, OK; PD-Rx Pharmaceuticals Inc.; 2022.	Caritis SN, Hebert MF. A pharmacologic approach to the use of glyburide in pregnancy. Obstet Gynecol. 2013 Jun;121(6):1309-1312. doi: 10.1097/AOG.0b013e31829007f0. PMID: 23812467; PMCID: PMC5738659.	Isoherranen N, Thummel KE. Drug metabolism and transport during pregnancy: how does drug disposition change during pregnancy and what are the mechanisms that cause such changes? Drug Metab Dispos. 2013 Feb;41(2):256-62. doi: 10.1124/dmd.112.050245.	Hebert MF, Ma X, Naraharisetti SB, Krudys KM, Umans JG, Hankins GD, Caritis SN, Miodovnik M, Mattison DR, Unadkat JD, Kelly EJ, Blough D, Cobelli C, Ahmed MS, Snodgrass WR, Carr DB, Easterling TR, Vicini P; Obstetric-Fetal Pharmacology Research Unit Network. Are we optimizing gestational diabetes treatment with glyburide? The pharmacologic basis for better clinical practice. Clin Pharmacol Ther. …
glyburide and metformin	Contraindicated. Glyburide and metformin hydrochloride tablets should be discontinued at least two weeks before expected delivery.	It cannot be definitely established that there is an absence of risk because of methodological limitations, including small sample size and inconsistent comparator groups.	Prolonged severe hypoglycemia (4 to 10 days) has been reported in neonates born to mothers who were receiving a sulfonylurea drug at the time of delivery. Poorly controlled diabetes mellitus in pregnancy increases the maternal risk for diabetic ketoacidosis, pre-eclampsia, spontaneous abortions, preterm delivery, and delivery complications. Advise premenopausal females of the potential for an uni…	This evidence is derived from a study containing 12 pregnant participants and another containing 37 pregnant participants. If the decision is made to treat with metformin during pregnancy, there is likely no need for a dose adjustment. There is an increase in renal clearance and volume of distribution but the change is clinically irrelevent. Metformin is also likely influenced by the transporter …	glyburide and metformin hydrochloride (glyburide and metformin hydrochloride) [package insert]. Burbank, CA; Bryant Ranch Prepack; 2022.	Eyal S, Easterling TR, Carr D, Umans JG, Miodovnik M, Hankins GD, Clark SM, Risler L, Wang J, Kelly EJ, Shen DD, Hebert MF. Pharmacokinetics of metformin during pregnancy. Drug Metab Dispos. 2010 May;38(5):833-40. doi: 10.1124/dmd.109.031245.	Charles B, Norris R, Xiao X, Hague W (2006) Population pharmacokinetics of metformin in late pregnancy. Ther Drug Monit 28(1):67–72. https://doi.org/10.1097/01.ftd.0000184161. 52573.0e	Isoherranen N, Thummel KE. Drug metabolism and transport during pregnancy: how does drug disposition change during pregnancy and what are the mechanisms that cause such changes? Drug Metab Dispos. 2013 Feb;41(2):256-62. doi: 10.1124/dmd.112.050245.	Hebert MF, Ma X, Naraharisetti SB, Krudys KM, Umans JG, Hankins GD, Caritis SN, Miodovnik M, Mattison DR, Unadkat JD, Kelly EJ, Blough D, Cobelli C, Ahmed MS, Snodgrass WR, Carr DB, Easterling TR, Vicini P; Obstetric-Fetal Pharmacology Research Unit Network. Are we optimizing gestational diabetes treatment with glyburide? The pharmacologic basis for better clinical practice. Clin Pharmacol Ther. …
ioflupane I-123	Contraindicated.	May cause fetal harm. Radioactive iodine products cross the placenta and can permanently impair fetal thyroid function. There are no available data on use in pregnant women to evaluate for a drug-associated risk of major birth defects, miscarriage or adverse maternal or fetal outcomes.	Assess for pregnancy before administering. Administration of an appropriate thyroid blocking agent is recommended before use in a pregnant woman to protect the woman and fetus from accumulation of iodine-123.	Ioflupane I-123 can cross the placenta due to it being water soluble; it can pass through the kidneys and move into the amniotic fluid via the urine. Exposure of the fetus to radiography, computed tomography (CT) and nuclear medicine imaging can be limited to safe levels, but an abdominal-pelvic CT will cause significant exposure to fetuses. 8 to 10 weeks after conception, the fetal thyroid start…	DaTscan (ioflupane I-123) [package insert]. Arlington Heights, IL; GE Healthcare, Medi-Physics, Inc.; 2022.	Mattsson S, Leide-Svegborn S, Andersson M. X-RAY AND MOLECULAR IMAGING DURING PREGNANCY AND BREASTFEEDING-WHEN SHOULD WE BE WORRIED? Radiat Prot Dosimetry. 2021 Oct 12;195(3-4):339-348. doi: 10.1093/rpd/ncab041.
metformin hydrochloride	Contraindicated.	Limited data with metformin hydrochloride tablets in pregnant women are not sufficient to determine a drug-associated risk for major birth defects or miscarriage. Published studies with metformin use during pregnancy have not reported a clear association with metformin and major birth defect or miscarriage risk. There are risks to the mother and fetus associated with poorly controlled diabetes me…	Discuss the potential for unintended pregnancy with premenopausal women as therapy with metformin hydrochloride may result in ovulation in some anovulatory women.	This evidence is derived from a study containing 12 pregnant participants and another containing 37 pregnant participants. If the decision is made to treat with metformin during pregnancy, there is likely no need for a dose adjustment. There is an increase in renal clearance and volume of distribution but the change is clinically irrelevent. Metformin is also likely influenced by the transporter …	Metformin Hydrochloride (metformin hydrochloride) [package insert]. Indiana, PA; Remedy Repack, Inc.; 2022.	Eyal S, Easterling TR, Carr D, Umans JG, Miodovnik M, Hankins GD, Clark SM, Risler L, Wang J, Kelly EJ, Shen DD, Hebert MF. Pharmacokinetics of metformin during pregnancy. Drug Metab Dispos. 2010 May;38(5):833-40. doi: 10.1124/dmd.109.031245.	Charles B, Norris R, Xiao X, Hague W (2006) Population pharmacokinetics of metformin in late pregnancy. Ther Drug Monit 28(1):67–72. https://doi.org/10.1097/01.ftd.0000184161. 52573.0e	Isoherranen N, Thummel KE. Drug metabolism and transport during pregnancy: how does drug disposition change during pregnancy and what are the mechanisms that cause such changes? Drug Metab Dispos. 2013 Feb;41(2):256-62. doi: 10.1124/dmd.112.050245.
olanzapine and fluoxetine	Ask a health professional before use.	SSRI use, particularly later in pregnancy, may increase the risk for persistent pulmonary hypertension and symptoms of poor adaptation (respiratory distress, temperature instability, feeding difficulty, hypotonia, irritability, tremor) in the neonate. Olanzapine may cause extrapyramidal symptoms and/or withdrawal symptoms in neonates with third trimester exposure.	Overall available data from published epidemiologic studies and postmarketing reports of pregnant women exposed to olanzapine or fluoxetine have not established a drug-associated increased risk of major birth defects or miscarriage. Consider the risk of untreated depression when discontinuing or changing treatment with antidepressant medication during pregnancy and the postpartum.	This evidence is derived from a study containing 8 pregnant participants. If the decision is made to treat during pregnancy, small decrease in serum concentrations during the 3rd trimester are considered likely to be clinically irrelevent. Likely a result of CYP2D6 induction. Also minorly metabolized by CYP2C9 and CYP2C19. Further investigation is required.. This evidence is derived from a study …	Olanzapine and Fluoxetine (olanzapine and fluoxetine) [package insert]. Cranbury, NJ; Par Pharmaceuticals, Inc.; 2022.	Schoretsanitis G, Spigset O, Stingl JC, Deligiannidis KM, Paulzen M, Westin AA. The impact of pregnancy on the pharmacokinetics of antidepressants: a systematic critical review and meta-analysis. Expert Opin Drug Metab Toxicol. 2020 May;16(5):431-440. doi: 10.1080/17425255.2020.1750598.
paclitaxel	Ask a health professional before use.	Paclitaxel can cause fetal harm when administered to a pregnant woman.	There are no adequate and well-controlled studies in pregnant women. If paclitaxel is used during pregnancy, or if the patient becomes pregnant while receiving this drug, the patient should be apprised of the potential hazard to the fetus.	This evidence is derived from a study containing 20 pregnant patients. Paclitaxel clearance increased in pregnant patients, which resulted in lower exposure compared to non-pregnant patients. These PK changes will not likely require dose adjustments. Further investigation is required.	Paclitaxel (paclitaxel) [package insert]. Piscataway, NJ; MSN Laboratories Private Limited; 2021.	Janssen JM, Van Calsteren K, Dorlo TPC, Halaska MJ, Fruscio R, Ottevanger P, Schröder CP, Boere I, Witteveen PO, Painter RC, Bekkers R, Drochytek V, Beijnen JH, Huitema ADR, Amant FCH. Population Pharmacokinetics of Docetaxel, Paclitaxel, Doxorubicin and Epirubicin in Pregnant Women with Cancer: A Study from the International Network of Cancer, Infertility and Pregnancy (INCIP). Clin Pharmacokine…	Westin AA, Brekke M, Molden E, Skogvoll E, Castberg I, Spigset O. Treatment With Antipsychotics in Pregnancy: Changes in Drug Disposition. Clin Pharmacol Ther. 2018 Mar;103(3):477-484. doi: 10.1002/cpt.770. Epub 2017 Sep 19.
paroxetine	Contraindicated.	Menopausal VMS does not occur during pregnancy and may cause fetal harm. For women who intend to become pregnant or are in their first trimester of pregnancy, paroxetine should only be initiated after consideration of the other available treatment options.	Data would suggest that the risk of a cardiac abnormality following paroxetine exposure in the first trimester may increase the risk from 1% to 2%. Exposure to SSRIs in late pregnancy may lead to an increased risk for neonatal complications requiring prolonged hospitalization, respiratory support, and tube feeding, and/or persistent pulmonary hypertension of the newborn (PPHN).	This evidence is derived from a study containing 19 pregnant participants. If the decision is made to treat during pregnancy, there is possibly a decrease in serum concentrations during the 3rd trimester. Pregnancy may necessitate an 100% increase in dose during the 3rd trimester to maintain concentrations. Therapeutic drug monitoring (TDM) is advised. Likely concentrations are altered via metabo…	Brisdelle (paroxetine) [package insert]. Roswell, GA; Sebela Therapeutics, LLC; 2022.	Westin AA, Brekke M, Molden E, Skogvoll E, Spigset O (2017) Selective serotonin reuptake inhibitors and venlafaxine in pregnancy: Changes in drug disposition. PLoS ONE 12(7):e0181082. https://doi.org/10.1371/journal.pone.0181082
pioglitazone and metformin hydrochloride	Advise premenopausal females of the potential for an unintended pregnancy, may result in ovulation in some anovulatory women.	Limited data with pioglitazone in pregnant women are not sufficient to determine a drug-associated risk for major birth defects or miscarriage. Published studies with metformin use during pregnancy have not reported a clear association with metformin and major birth defect or miscarriage risk.	Poorly controlled diabetes in pregnancy increases the maternal risk for diabetic ketoacidosis, pre-eclampsia, spontaneous abortions, preterm delivery, still birth and delivery complications. Also increases the fetal risk for major birth defects and macrosomia related morbidity.	This evidence is derived from a study containing 12 pregnant participants and another containing 37 pregnant participants. If the decision is made to treat with metformin during pregnancy, there is likely no need for a dose adjustment. There is an increase in renal clearance and volume of distribution but the change is clinically irrelevent. Metformin is also likely influenced by the transporter …	Actoplus Met (pioglitazone and metformin hydrochloride) [package insert]. Lexington, MA; Takeda Pharmaceuticals America, Inc.; 2021.	Eyal S, Easterling TR, Carr D, Umans JG, Miodovnik M, Hankins GD, Clark SM, Risler L, Wang J, Kelly EJ, Shen DD, Hebert MF. Pharmacokinetics of metformin during pregnancy. Drug Metab Dispos. 2010 May;38(5):833-40. doi: 10.1124/dmd.109.031245.	Charles B, Norris R, Xiao X, Hague W (2006) Population pharmacokinetics of metformin in late pregnancy. Ther Drug Monit 28(1):67–72. https://doi.org/10.1097/01.ftd.0000184161. 52573.0e	Isoherranen N, Thummel KE. Drug metabolism and transport during pregnancy: how does drug disposition change during pregnancy and what are the mechanisms that cause such changes? Drug Metab Dispos. 2013 Feb;41(2):256-62. doi: 10.1124/dmd.112.050245.
rifapentine	Contraindicated.	May cause fetal harm. When administered during the last few weeks of pregnancy, rifapentine may increase the risk for maternal postpartum hemorrhage and bleeding in the exposed neonate. Monitor prothrombin time of pregnant women and neonates who are exposed to treatment during the last few weeks of pregnancy.	There are no adequate and well controlled studies of rifapentine use during pregnancy. Available data from clinical trials, case reports, epidemiology studies and postmarketing experience with use in pregnant women are insufficient to establish a drug-associated risk of major birth defects, adverse maternal or fetal outcomes. Active tuberculosis in pregnancy is associated with adverse maternal an…	This evidence is derived from a study containing 50 pregnant participants. Clearance is 28% lower in pregnant women versus postpartum, but there does not seem to be a need for dose adjustment. Further investigation is required.	Priftin (rifapentine) [package insert]. Libertyville, IL; A-S Medication Solutions; 2022.	Mathad JS, Savic R, Britto P, Jayachandran P, Wiesner L, Montepiedra G, Norman J, Zhang N, Townley E, Chakhtoura N, Bradford S, Patil S, Popson S, Chipato T, Rouzier V, Langat D, Chalermchockcharoentkit A, Kamthunzi P, Gupta A, Dooley KE. Pharmacokinetics and Safety of 3 Months of Weekly Rifapentine and Isoniazid for Tuberculosis Prevention in Pregnant Women. Clin Infect Dis. 2022 May 3;74(9):160…
ritonavir	Contraindicated.	Oral solution not recommended for pregnancy due to its alcohol content. The treatment contains the excipients alcohol (43.2% v/v) and propylene glycol (26.57% w/v). There is no known safe level of ethanol exposure during pregnancy.	RTV should only be used as a low-dose booster for other protease inhibitors. Prospective pregnancy data from the Antiretroviral Pregnancy Registry (APR) are not sufficient to adequately assess the risk of birth defects or miscarriage. Available data from the APR show no difference in the rate of overall birth defects for ritonavir compared to the background rate for major birth defects of 2.7% in…	Based on evaluation of the published literature and evidence derived from a study containing 64 pregnant patients. Ritonavir exposures are reduced during pregnancy relative to postpartum. Likely due to primary metabolizer, CYP3A4. Ritonavir inhibits CYP3A, CYP2C8, CYP2C9, CYP2D6, and P-gp whilst inducing CYP2B6, CYP2C9, CYP2C19, UGT1A4 and P-gp. No dose adjustment is likely necessary when used as…	Norvir (ritonavir) [package insert]. North Chicago, IL; AbbVie, Inc.; 2020.	Clinical Info HIV.Gov. Recommendations for the Use of Antiretroviral Drugs During Pregnancy and Interventions to Reduce Perinatal HIV Transmission in the United States. https://clinicalinfo.hiv.gov/en/guidelines/perinatal/ritonavir-norvir-rtv. (accessed 2022 July 13).	Eke AC, Mirochnick M. Ritonavir and cobicistat as pharmacokinetic enhancers in pregnant women. Expert Opin Drug Metab Toxicol. 2019;15(7):523-525.	Stek A, Best BM, Wang J, Capparelli EV, Burchett SK, Kreitchmann R, Rungruengthanakit K, Cressey TR, Mofenson LM, Smith E, Shapiro D, Mirochnick M. Pharmacokinetics of Once Versus Twice Daily Darunavir in Pregnant HIV-Infected Women. J Acquir Immune Defic Syndr. 2015 Sep 1;70(1):33-41. doi: 10.1097/QAI.0000000000000668.
rosiglitazone maleate and metformin hydrochloride	Use during pregnancy only if the potential benefit justifies the potential risk to the fetus. Not recommended for use in pregnancy.	No adequate and well-controlled studies in pregnant women.	Risk is increased in pregnancies complicated by hyperglycemia and may be decreased with good metabolic control. It is essential for patients with diabetes or history of gestational diabetes to maintain good metabolic control throughout pregnancy. Careful monitoring of glucose control is essential in such patients. Most experts recommend that insulin monotherapy be used during pregnancy to maintai…	This evidence is derived from studies containing 12 pregnant participants and 27 pregnant participants. If the decision is made to treat with metformin during pregnancy, there is likely no need for a dose adjustment. There is an increase in renal clearance and volume of distribution but the change is likely clinically irrelevant. Metformin is also likely influenced by the transporter OCT2, which …	Avandamet (rosiglitazone maleate and metformin hydrochloride) [package insert]. Research Triangle Park, NC; GlaxoSmithKline; 2016.	Eyal S, Easterling TR, Carr D, Umans JG, Miodovnik M, Hankins GD, Clark SM, Risler L, Wang J, Kelly EJ, Shen DD, Hebert MF. Pharmacokinetics of metformin during pregnancy. Drug Metab Dispos. 2010 May;38(5):833-40. doi: 10.1124/dmd.109.031245.	Charles B, Norris R, Xiao X, Hague W (2006) Population pharmacokinetics of metformin in late pregnancy. Ther Drug Monit 28(1):67–72. https://doi.org/10.1097/01.ftd.0000184161. 52573.0e	Isoherranen N, Thummel KE. Drug metabolism and transport during pregnancy: how does drug disposition change during pregnancy and what are the mechanisms that cause such changes? Drug Metab Dispos. 2013 Feb;41(2):256-62. doi: 10.1124/dmd.112.050245.	Chan LY, Yeung JH, Lau TK. Placental transfer of rosiglitazone in the first trimester of human pregnancy. Fertil Steril. 2005 Apr;83(4):955-8. doi: 10.1016/j.fertnstert.2004.10.045. PMID: 15820806.
sertraline hydrochloride	Consider the risks of untreated depression when discontinuing or changing treatment with antidepressant medication during pregnancy and postpartum. Third trimester use may increase risk for persistent pulmonary hypertension and withdrawal in the neonate.	Available published epidemiologic studies of pregnant women exposed to sertraline in the first trimester suggest no difference in major birth defect risk compared to the background rate for major birth defects in comparator populations.	Exposure to SSRIs and SNRIs, including sertraline hydrochloride in late pregnancy may lead to an increased risk for neonatal complications requiring prolonged hospitalization, respiratory support, and tube feeding, and/or persistent pulmonary hypertension of the newborn (PPHN). When treating a pregnant woman with sertraline hydrochloride during the third trimester, carefully consider both the pot…	This evidence is derived from a study containing 9 pregnant participants. If the decision is made to treat during pregnancy, there should be a consideration to use therapeutic drug monitoring (TDM) throughout treatment. Dose-adjusted concentrations of sertraline were increased in the 3rd trimester, but the reference range of sertraline is wide, and it is unlikely that the change will affect treat…	Sertraline Hydrochloride (sertraline hydrochloride) [package insert]. Central Islip, NY; Ascent Pharmaceuticals; 2021.	Schoretsanitis G, Spigset O, Stingl JC, Deligiannidis KM, Paulzen M, Westin AA. The impact of pregnancy on the pharmacokinetics of antidepressants: a systematic critical review and meta-analysis. Expert Opin Drug Metab Toxicol. 2020 May;16(5):431-440. doi: 10.1080/17425255.2020.1750598.	Heinonen E, Blennow M, Blomdahl-Wetterholm M, Hovstadius M, Nasiell J, Pohanka A, Gustafsson LL, Wide K. Sertraline concentrations in pregnant women are steady and the drug transfer to their infants is low. Eur J Clin Pharmacol. 2021 Sep;77(9):1323-1331. doi: 10.1007/s00228-021-03122-z.	Westin AA, Brekke M, Molden E, Skogvoll E, Spigset O (2017) Selective serotonin reuptake inhibitors and venlafaxine in pregnancy: Changes in drug disposition. PLoS ONE 12(7):e0181082. https://doi.org/10.1371/journal.pone.0181082
tinidazole	Has not been studied in pregnant individuals. No official recommendation.	The use of tinidazole in pregnant patients has not been studied for bacterial vaginosis. Available published data from a case-control study and case report with tinidazole use in pregnant women are insufficient to identify a risk of major birth defects, miscarriage or adverse maternal or fetal outcomes.	There are risks associated with untreated lower genital tract infections during pregnancy.	This evidence is derived from a study containing 21 pregnant participants. If the decision is made to treat during pregnancy, it should not be given in the first trimester of pregnancy because of placental transfer. Further investigation is required.	Tinidazole (tinidazole) [package insert]. Parsippany, NJ; Edenbridge Pharmaceuticals LLC; 2022.	Czeizel AE, Kazy Z, Vargha P. Oral tinidazole treatment during pregnancy and teratogenesis. Int J Gynaecol Obstet. 2003 Dec;83(3):305-6. doi: 10.1016/s0020-7292(03)00259-5.	Karhunen M. Placental transfer of metronidazole and tinidazole in early human pregnancy after a single infusion. Br J Clin Pharmacol. 1984 Aug;18(2):254-7. doi: 10.1111/j.1365-2125.1984.tb02465.x.
venlafaxine	When treating a pregnant woman with venlafaxine tablets during the third trimester, the physician should carefully consider the potential risks and benefits of treatment.	Treating during pregnancy can potentially cause complications with the fetus.	Neonates exposed to venlafaxine tablets, other SNRIs (Serotonin and Norepinephrine Reuptake Inhibitors), or SSRIs (Selective Serotonin Reuptake Inhibitors), late in the third trimester have developed complications requiring prolonged hospitalization, respiratory support, and tube feeding.	This evidence is derived from a study containing 33 pregnant participants. If the decision is made to treat during pregnancy, the small decrease in serum concentrations during the 3rd trimester is considered to be likely clinically irrelevent. Likely due to metabolism via CYP2D6, CYP1A2, CYP3A4, and CYP2C9. Further investigation is required.	Venlafaxine (venlafaxine) [package insert]. Burbank, CA; Bryant Ranch Prepack; 2022.	Schoretsanitis G, Spigset O, Stingl JC, Deligiannidis KM, Paulzen M, Westin AA. The impact of pregnancy on the pharmacokinetics of antidepressants: a systematic critical review and meta-analysis. Expert Opin Drug Metab Toxicol. 2020 May;16(5):431-440. doi: 10.1080/17425255.2020.1750598.	Westin AA, Brekke M, Molden E, Skogvoll E, Spigset O (2017) Selective serotonin reuptake inhibitors and venlafaxine in pregnancy: Changes in drug disposition. PLoS ONE 12(7):e0181082. https://doi.org/10.1371/journal.pone.0181082

## Sheet: Table 3A
Drug	Recommendation	Reason for Recommendation	Safety Considerations	Pharmacokinetic Evidence for possible dose adjustment	References
albendazole	May cause fetal harm. Avoid usage in pregnant women except in clinical circumstances where no alternative management is appropriate. Should be used during pregnancy only if the potential benefit justifies the potential risk to the fetus. Apprise patient of potential hazard to the fetus.	There are limited data on use of albendazole in pregnant women to inform a drug-associated risk of major birth defects and miscarriage.	Available human data from a small number of published case series and reports on the use of multiple-dose albendazole in the 1st trimester of pregnancy, and several published studies on single-dose albendazole use later in pregnancy, have not identified any drug-associated risks for major birth defects, miscarriage, or adverse maternal or fetal outcomes.	Further investigation is required.	Albendazole (albendazole) [package insert]. Mississauga, Ontario; GlaxoSmithKline; 2021.
ambrisentan	Contraindicated.	Black Box Warning: Do not administer ambrisentan to a pregnant female because it may cause fetal harm. Because of the risk of embryo-fetal toxicity, for all female patients, ambrisentan tablets are only available through a restricted program under a Risk Evaluation and Mitigation Strategy (REMS) called the ambrisentan REMS.	Ambrisentan may cause fetal harm when administered during pregnancy and is contraindicated for use in females who are pregnant. Obtain monthly pregnancy tests during treatment.	Further investigation is required.	Ambrisentan (ambrisentan) [package insert]. Pennington, NJ; Zydus Pharmaceuticals (USA) Inc.; 2021.	Takatsuki S, Rosenzweig EB, Zuckerman W, Brady D, Calderbank M, Ivy DD. Clinical safety, pharmacokinetics, and efficacy of ambrisentan therapy in children with pulmonary arterial hypertension. Pediatr Pulmonol. 2013 Jan;48(1):27-34. doi: 10.1002/ppul.22555.
benznidazole	Contraindicated. Acute Chagas disease has symptoms that may be serious or life-threatening. The risks versus benefits of treatment with benznidazole to the mother and the fetus should be evaluated on a case-by-case basis.	Can cause fetal harm.	Chronic Chagas disease is usually not life-threatening. Since pregnancy findings are inconsistent, treatment of chronic Chagas disease during pregnancy is not recommended due to risk of embryo-fetal toxicity.	Further investigation is required.	Benznidazole (benznidazole) [package insert]. Florham Park, NJ; Exeltis USA, Inc.; 2021.
bexarotene	Contraindicated.	Black Box Warning: Bexarotene is a member of the retinoid class of drugs that is associated with birth defects in humans. Bexarotene must not be administered to a pregnant woman.	Bexarotene can cause fetal harm when administered to a pregnant female.	Further investigation is required.	Bexarotene (bexarotene) [package insert]. North Wales, PA; Teva Pharmaceuticals USA, Inc.; 2021.
bosentan	Contraindicated.	Black Box Warning: Based on animal data, bosentan is likely to cause major birth defects if used during pregnancy.	Bosentan may cause fetal harm when administered to a pregnant female and is contraindicated in females who are pregnant. Advise females of reproductive potential of the potential risk to a fetus.	Further investigation is required.	Tracleer (bosentan) [package insert]. South San Francisco, CA; Actelion Pharmaceuticals US, Inc.; 2022.
brincidofovir	Contraindicated.	May cause fetal harm.	Advise individuals of reproductive potential with partners of childbearing potential to use condoms during treatment and for at least 4 months after the last dose.	Further investigation is required.	Tembexa (Brincidofovir) [package insert]. Tredegar, Gwent, UK; Penn Pharmaceutical Services, Ltd.; 2022.
bromocriptine mesylate	Contraindicated.	The safety of bromocriptine treatment during pregnancy to the mother and fetus has not been established.	Patients must be monitored closely throughout pregnancy for signs and symptoms that may signal the enlargement of a previously undetected or existing prolactin-secreting tumor.	Further investigation is required.	Bromocriptine mesylate (bromocriptine mesylate) [package insert]. Morgantown, WV; Mylan Pharmaceuticals Inc.; 2021.
chorionic gonadotropin	Contraindicated.	Chorionic gonadotropin may cause fetal harm when administered to a pregnant woman.	Defects of forelimbs and central nervous system and alterations in sex ratio have been reported in mice receiving combined gonadotropin and chorionic gonadotropin therapy in dosages to induce superovulation. Multiple ovulations with resulting plural gestations (mostly twins) have been reported to occur in approximately 20% of pregnancies when conception has followed chorionic gonadotropin therapy.	Further investigation is required.	Chorionic Gonadotropin (chorionic gonadotropin) [package insert]. Lake Zurich, IL; Fresenius Kabi USA Inc.; 2020.
cladribine	Contraindicated.	Black Box Warning: Contraindicated for use in pregnant women. There is a risk of fetal harm.	Do not use in pregnant women. Men with partners of reproductive potential who do not plan to use effective contraception during dosing and for 6 months after the last dose in each treatment course should not use treatment. There are no adequate data on the developmental risk associated with use of cladribine in pregnant women.	Further investigation is required.	Mavenclad (cladribine) [package insert]. Rockland, MA; EMD Serono, Inc.; 2022.
crotalidae immune F(ab)2(equine)	Contraindicated.	May cause fetal harm.	It is not known whether the treatment can cause fetal harm when administered to a pregnant woman or can affect reproduction capacity.	Further investigation is required.	Anavip (crotalidae immune F(ab)2(equine)) [package insert]. Franklin, TN; Rare Disease Therapeutics, Inc.; 2021.
cupric sulfate	Contraindicated.	Safety for use in pregnancy has not been established.	Use of copper in women of childbearing potential requires that anticipated benefits be weighed against possible hazards.	Further investigation is required.	Cupric Sulfate (cupric sulfate) [package insert]. Shirley, NY; American Regent, Inc.; 2011.
danazol	Contraindicated.	Black Box Warning: If a patient becomes pregnant while taking danazol, administration of the drug should be discontinued and the patient should be apprised of the potential risk to the fetus. Exposure to danazol in utero may result in androgenic effects on the female fetus; reports of clitoral hypertrophy, labial fusion, urogenital sinus defect, vaginal atresia, and ambiguous genitalia have been …	Advise females of reproductive potential of the potential risk to a fetus.	Further investigation is required.	Danazol (danazol) [package insert]. Pulaski, TN; AvKARE, Inc.; 2022.
denosumab	Contraindicated.	May cause fetal harm.	There are insufficient data with denosumab use in pregnant women to inform any drug-associated risks for adverse developmental outcomes.	Further investigation is required.	Prolia (denosumab) [package insert]. Thousand Oaks, California; Amgen Inc.; 2022.
dexamethasone phosphate	Contraindicated.	Since adequate human reproduction studies have not been done with corticosteroids, use of these drugs in pregnancy or in women of childbearing potential requires that the anticipated benefits be weighed against the possible hazards to the mother and embryo or fetus.	Infants born of mothers who have received substantial doses of corticosteroids during pregnancy should be carefully observed for signs of hypoadrenalism.	Further investigation is required.	Dexamethasone Sodium Phosphates (Dexamethasone Phosphate) [package insert]. Shirley, NY; American Regent, Inc.; 2013.
elagolix	Contraindicated.	Exposure to elagolix early in pregnancy may increase the risk of early pregnancy loss. Discontinue if pregnancy is confirmed	The limited human data with the use in pregnant women are insufficient to determine whether there is a risk for major birth defects or miscarriage.	Further investigation is required.	Orilissa (elagolix) [package insert]. North Chicago, IL ; AbbVie Inc.; 2021.
ethiodized oil	Contraindicated.	The use of ethiodized oil before or during pregnancy may interfere with thyroid function in both the pregnant woman and and her fetus and may affect fetal development. Thyroid dysfunction is an adverse reaction in the mother and infant.	Consider thyroid function testing in pregnant women and their infants if exposed either before or during pregnancy, if clinically indicated. Untreated hypothyroidism in pregnancy is associated with adverse perinatal outcomes, such as spontaneous abortion, preeclampsia, preterm birth, abruptio placentae, and fetal death.	Further investigation is required.	Lipiodol (ethiodized oil) [package insert]. Princeton, NJ, Guerbet LLC; 2022.
flortaucipir F-18	Contraindicated.	May cause fetal harm.	All radiopharmaceuticals, have the potential to cause fetal harm depending on the fetal stage of development and the magnitude of radiation dose. Advise a pregnant woman of the potential risks of fetal exposure to radiation doses with administration.	Further investigation is required.	Tauvid (Flortaucipir F-18) [package insert]. Philadelphia, PA; Eli Lilly and Company; 2022.
fludarabine phosphate	Contraindicated.	Based on its mechanism of action (DNA polymerase alpha, ribonucleotide reductase and DNA primase) fludarabine phosphate can cause fetal harm when administered to a pregnant woman. There are no adequate and well-controlled studies of fludarabine phosphate for injection in pregnant women.	The patient should be apprised of the potential hazard to the fetus.	Further investigation is required.	Fludarabine Phosphate (fludarabine phosphate) [package insert]. Carlsbad, CA; Leucadia Pharmaceuticals; 2019.
fluoroestradiol F 18	Contraindicated. There are no available data on use in pregnant women.	All radiopharmaceuticals have the potential to cause fetal harm depending on the fetal stage of development and the magnitude of radiation dose. Advise a pregnant woman of the potential risks of fetal exposure to radiation from administration.	Advise a pregnant woman of the potential risks of fetal exposure to radiation doses.	Further investigation is required.	Cerianna (Fluoroestradiol F 18) [package insert]. Marlborough, MA; Zionexa US Corp.; 2022.
ganciclovir sodium	Contraindicated.	May cause fetal toxicity. Placental transfer of ganciclovir has been shown to occur based on ex vivo experiments with human placenta and in at least one case report in a pregnant woman.	Advise females of reproductive potential of the potential risk to a fetus. No adequate human data are available to establish whether ganciclovir injection poses a risk to pregnancy outcomes.	Further investigation is required.	Gancicovir (ganciclovir sodium) [package insert]. Candiac, Canada; Pharmascience Inc.; 2021.	Gilstrap LC, Bawdon RE, Roberts SW, Sobhi S. The transfer of the nucleoside analog ganciclovir across the perfused human placenta. Am J Obstet Gynecol. 1994 Apr;170(4):967-72; discussion 972-3. doi: 10.1016/s0002-9378(94)70089-3.
glimepiride	Not recommended for use in pregnancy. Due to reports of prolonged severe hypoglycemia in neonates born to mothers receiving a sulfonylurea at the time of delivery, should be discontinued at least two weeks before expected delivery.	Available data from a small number of published studies and postmarketing experience with use in pregnancy have not identified any drug associated risks for major birth defects, miscarriage, or adverse maternal outcomes. Glimepiride crosses the placenta and has been associated with neonatal adverse reactions such as hypoglycemia.	Poorly controlled diabetes in pregnancy is also associated with risks to the mother and fetus.	Further investigation is required.	Amaryl (glimepiride) [package insert]. Bridgewater, NJ; Sanofi-Aventis U.S. LLC; 2021.
hydroxyzine hydrochloride	Contraindicated in early pregnancy.	May cause fetal harm.	Clinical data in human beings are inadequate to establish safety in early pregnancy.	Further investigation is required.	Hydroxyzine Hydrochloride (hydroxyzine hydrochloride) [package insert]. Bastian VA; Henry Schein Inc.; 2022.
ibrexafungerp	Contraindicated.	May cause fetal harm.	Available data on use in pregnant women are insufficient to draw conclusions about any drug-associated risks of major birth defects, miscarriage, or other adverse maternal or fetal outcomes.	Further investigation is required.	Brexafemme (ibrexafungerp) [package insert]. Jersey City, NJ; Scynexis, Inc.; 2022.
iobenguane I-123	Contraindicated. May cause fetal harm.	Radioactive iodine products cross the placenta and can permanently impair fetal thyroid function. Administration of an appropriate thyroid blocking agent is recommended before use in a pregnant woman to protect the woman and fetus from accumulation of I 123.	There are no available data on use in pregnant women to evaluate for a drug-associated risk of major birth defects, miscarriage or adverse maternal or fetal outcomes. All radiopharmaceuticals have the potential to cause fetal harm depending on the fetal stage of development and the magnitude of the radiation dose. Advise pregnant women of the potential risks of fetal exposure to radiation doses w…	Further investigation is required.	AdreView (iobenguane I-123) [package insert]. Arlington, IL; Medi-Physics Inc.; 2020.
iobenguane I-131	Contraindicated.	Based on the mechanism of action of reducing catecholamine uptake, it can cause fetal harm when administered to a pregnant woman. Advise pregnant women of the risk to a fetus.	Verify pregnancy status in females of reproductive potential prior to initiating treatment.	Further investigation is required.	Azedra (iobenguane I-131) [package insert]. New York, NY; Progenics Pharmaceuticals, Inc.; 2021.
isotretinoin	Contraindicated.	Black Box Warning: Treatment can cause life-threatening birth defects. There is an extremely high risk that severe birth defects will result if pregnancy occurs during treatment in any amount, even for short periods of time. Potentially any fetus exposed during pregnancy can be affected. There are no accurate means of determining whether an exposed fetus has been affected. Available only through …	Advise females of the potential risk to the fetus. Use of contraception for 1 month after ending isotretinoin therapy is used to provide an adequate safety margin to prevent fetal exposure, based on more than 5 elimination half-lives of the drug. However, there is evidence of greater variability in the elimination half-life (from 5.3 h to 7 d); thus, a 3-month window may be more appropriate.	Further investigation is required.	Absorica (isotretinoin) [package insert]. Cranbury, NJ; Sun Pharmaceutical Industries, Inc.; 2022.	Choi JS, Koren G, Nulman I. Pregnancy and isotretinoin therapy. CMAJ. 2013 Mar 19;185(5):411-3. doi: 10.1503/cmaj.120729.
leflunomide	Contraindicated.	Black Box Warning: Contraindicated for use in pregnant women because of the potential for fetal harm. Teratogenicity and embryo-lethality occurred in animals administered leflunomide. Stop and use an accelerated drug elimination procedure if the patient becomes pregnant.	Apprise the patient of the potential risk to the fetus.	Further investigation is required.	Arava (leflunomide) [package insert]. Bridgewater, NJ; sanofi-aventis U.S. LLC.; 2021.
lomitapide mesylate	Contraindicated.	May cause fetal harm.	If pregnancy is detected, discontinue.	Further investigation is required.	Juxtapid (lomitapide mesylate) [package insert]. Dublin, Ireland; Amryt Pharmaceuticals DAC; 2022.
lutetium Lu 177 dotatate	Contraindicated.	Based on its mechanism of action (somatostatin analog) can cause fetal harm when administered to a pregnant woman. There are no available data on use in pregnant women.	Advise pregnant women of the potential risk to a fetus. Advise males with female partners of reproductive potential to use effective contraception during treatment and for 4 months after the final dose.	Further investigation is required.	Lutathera (Lutetium Lu 177 dotatate) [package insert]. NJ; Advanced Accelerator Applications USA, Inc.; 2022.
macitentan	Contraindicated.	Black Box Warning: Do not administer to a pregnant female because it may cause fetal harm. For all female patients, macitentan is available only through a restricted program called the Macitentan Risk Evaluation and Mitigation Strategy (REMS).	Consistently shown to have teratogenic effects when administered to animals. If used during pregnancy, advise the patient of the potential risk to a fetus	Further investigation is required.	Opsumit (macitenan) [package insert]. South San Francisco, CA; Actelion Pharmaceuticals US, Inc.; 2021.
mavacamten	Contraindicated.	May cause fetal toxicity. There are no human data on the use during pregnancy to evaluate for a drug-associated risk of major birth defects, miscarriage, or other adverse maternal or fetal outcomes.	Advise about the potential risk to the fetus with maternal exposure during pregnancy.	Further investigation is required.	Camyzos (mavacamten) [package insert]. Brisbane, CA; MyoKardia, Inc.; 2022.
mechlorethamine hydrochloride	Contraindicated.	May cause fetal harm.	If this drug is used during pregnancy or if the patient becomes pregnant while taking this drug, the patient should be apprised of the potential hazard to a fetus. Advise males with female partners of reproductive potential to use a barrier method of contraception. Malformations may occur as a result of using this treatment during pregnancy.	Further investigation is required.	Valchlor (mechlorethamine hydrochloride) [package insert]. Iselin, NJ; Helsinn Therapeutics (U.S.), Inc.; 2022.
megesterol acetate	Contraindicated.	May cause fetal harm.	The estimated background risk of major birth defects and miscarriage for the indicated population is unknown.	Further investigation is required.	Megace ES (megesterol acetate) [package insert]. Malvern, PA; Endo Pharmaceuticals Inc.; 2019.
methotrexate sodium	Contraindicated.	Black Box Warning: Treatment can cause embryo-fetal toxicity, including fetal death. For non-neoplastic diseases, methotrexate tablets are contraindicated in pregnancy. Methotrexate exposure during the first trimester of pregnancy is associated with an increased incidence of spontaneous abortions and multiple adverse developmental outcomes, including skull anomalies, facial dysmorphism, central n…	Advise males with female partners of reproductive potential to use effective contraception during methotrexate tablets treatment and for 3 months after the final dose. Based on published reports and its mechanism of action, can cause fetal harm, including fetal death, when administered to a pregnant woman.	Further investigation is required.	Methotrexate Sodium (methotrexate sodium) [package insert]. Indiana, PA; Remedy Repack, Inc.; 2022.	Dawson AL, Riehle-Colarusso T, Reefhuis J, Arena JF; National Birth Defects Prevention Study. Maternal exposure to methotrexate and birth defects: a population-based study. Am J Med Genet A. 2014 Sep;164A(9):2212-6. doi: 10.1002/ajmg.a.36625. Epub 2014 Jun 4. PMID: 24898111; PMCID: PMC4617640.
miltefosine	Contraindicated.	Black Box Warning: May cause fetal harm. Fetal death and teratogenicity, occurred in animals administered miltefosine at doses lower than the recommended human dose. Do not administer to pregnant women.	Advise females of the potential risk to a fetus. Embryo-fetal toxicity, including death and teratogenicity, was observed in animals administered miltefosine prior to mating, during early pregnancy, and during organogenesis at doses lower than the maximum recommended human dose (MRHD).	Further investigation is required.	Impavido (miltefosine) [package insert]. Orlando, FL; Profounda, Inc.; 2021.
minoxidil (solution, topical 2%)	Contraindicated.	May be harmful if used when pregnant.	Minoxidil topical solution 2% will not prevent or improve hair loss related to pregnancy.	Further investigation is required.	Hair Regrowth Treatment (minoxidil 2%) [package insert]. Allegan, MI; Perrigo, Inc.; 2021.
minoxidil (tablet)	Ask a health professional before use.	May cause fetal harm.	There are no adequate and well controlled studies in pregnant women. Minoxidil should be used during pregnancy only if the potential benefit justifies the potential risk to the fetus	Further investigation is required.	Minoxidil (minoxidil) [package insert]. Pulaski, TN; AvKARE, Inc.; 2022.
mitomycin	Contraindicated.	Safe use of mitomycin in pregnant women has not been established.	Advise of potential risk to a fetus. Verify pregnancy status in females of reproductive potential prior to use.	Further investigation is required.	Mitomycin (mitomycin) [package insert]. Piscataway, NJ; Archis Pharma LLC; 2022.
mitoxantrone	Contraindicated.	Mitoxantrone is considered a potential human teratogen because of its mechanism of action (intercalation with the DNA molecule) and the developmental effects demonstrated by related agents.	Mitoxantrone injection may cause fetal harm when administered to a pregnant woman. There are no adequate and well-controlled studies in pregnant women. If this drug is used during pregnancy or if the patient becomes pregnant while taking this drug, the patient should be apprised of the potential risk to the fetus.	Further investigation is required.	Mitoxantrone (mitoxantrone) [package insert]. Lake Forest, IL; Hospira, Inc.; 2022.
mycophenolate mofetil	Contraindicated.	Black Box Warning: Use during pregnancy is associated with increased risks of first trimester pregnancy loss and congenital malformations. Avoid if safer treatment options are available. Use during pregnancy is associated with increased risks of first trimester pregnancy loss and congenital malformations.	A spectrum of congenital malformations has been reported in 23 to 27% of live births in MMF exposed pregnancies, based on published data from pregnancy registries. Malformations that have been documented include external ear, eye, and other facial abnormalities including cleft lip and palate, and anomalies of the distal limbs, heart, esophagus, kidney, and nervous system. Based on published data …	Further investigation is required.	Mycophenolate Mofetil (mycophenolate mofetil) [package insert]. Morgantown, WV; Mylan Pharmaceuticals Inc.; 2022.
nifurtimox	Contraindicated.	May cause fetal harm.	Advise females of the potential risk to a fetus. Advise males to use condoms with female partners of reproductive potential.	Further investigation is required.	Lampit (nifurtimox) [package insert]. Whippany, NJ ; Bayer HealthCare Pharmaceuticals Inc.; 2022.
nintedanib	Contraindicated.	Based on findings from animal studies and its mechanism of action (binds to the intracellular ATP binding pocket of fibroblast growth factor receptors (FGFRs), platelet-derived growth factor receptors (PDGFRs) and vascular endothelial growth factor receptors (VEGFRs)), can cause fetal harm when administered to a pregnant woman. There are no data on the use of it during pregnancy.	Advise pregnant women of the potential risk to a fetus.	Further investigation is required.	Ofev (nintedanib) [package insert]. Ridgefield, CT; Boehringer Ingelheim Pharmaceuticals, Inc.; 2022.	Wollin L, Wex E, Pautsch A, Schnapp G, Hostettler KE, Stowasser S, Kolb M. Mode of action of nintedanib in the treatment of idiopathic pulmonary fibrosis. Eur Respir J. 2015 May;45(5):1434-45. doi: 10.1183/09031936.00174914.
pafolacianine injection	Contraindicated.	The medication is a fluorescent drug that targets the folate receptor alpha. May cause fetal harm if administered to a pregnant woman.	Advise females of reproductive potential of the potential risk to a fetus.	Further investigation is required.	Cytalux (Pafolacianine injection) [package insert]. West Lafayette, IN; On Target Laboratories; 2022.	National Center for Biotechnology Information. PubChem Compound Summary for CID 135565623, Pafolacianine. https://pubchem.ncbi.nlm.nih.gov/compound/Pafolacianine. Accessed July 17, 2022.
phentermine and topiramate	Contraindicated.	May cause fetal harm. Available through a limited program under a Risk Evaluation and Mitigation Strategy (REMS).	Data from a pregnancy registry and epidemiologic studies indicate that a fetus exposed to topiramate, a component of phertermine and topiramate, in the first trimester of pregnancy has an increased risk of oral clefts.	Further investigation is required.	Qsymia (phentermine and topiramate) [package insert]. Winchester, KY; Catalent Pharma Solutions, LLC; 2022.
pioglitazone and glimepiride	Contraindicated. Due to reports of prolonged severe hypoglycemia in neonates born to mothers receiving a sulfonylurea at the time of delivery, pioglitazone and glimepiride should be discontinued at least two weeks before expected delivery.	Limited data with pioglitazone and glimepiride tablets or pioglitazone in pregnant women are not sufficient to determine a drug-associated risk for major birth defects or miscarriage. There are clinical considerations related to fetal and neonatal adverse reactions and drug discontinuation if glimepiride is used during pregnancy. There are risks to the mother and fetus associated with poorly cont…	Poorly controlled diabetes in pregnancy increases the maternal risk for diabetic ketoacidosis, pre-eclampsia, spontaneous abortions, preterm delivery, still birth and delivery complications. Neonates of women with gestational diabetes, who are treated with sulfonylureas during pregnancy, may be at increased risk for neonatal intensive care unit admission, and may develop respiratory distress, hyp…	Pioglitazone is highly bound to plasma proteins (99.8%) and highly metabolized in the liver. Glimepiride does not have any adequate or well-controlled trials within pregnancy. Further investigation is required.	pioglitazone and glimepiride (pioglitazone and glimepiride) [package insert]. Mason, OH; Prasco Laboratories; 2021.	Kemball ML, McIver C, Milner RD, et al. Neonatal hypoglycaemia in infants of diabetic mothers given sulphonylurea drugs in pregnancy. Arch Dis Child. 1970;45:696–701. doi: 10.1136/adc.45.243.696.	Kavitha N, De S, Kanagasabai S. Oral Hypoglycemic Agents in pregnancy: An Update. J Obstet Gynaecol India. 2013 Apr;63(2):82-7. doi: 10.1007/s13224-012-0312-z.	Langer O. Oral anti-hyperglycemic agents for the management of gestational diabetes mellitus. Obstet Gynecol Clin North Am. 2007 Jun;34(2):255-74, ix. doi: 10.1016/j.ogc.2007.03.004. PMID: 17572271.
pomalidomide	Contraindicated.	Black Box Warning: Contraindicated in pregnancy. Pomalidomide is a thalidomide analogue. Thalidomide is a known human teratogen that causes severe life-threatening birth defects.	Pomalidomide is present in the semen of patients receiving the drug. Therefore, males must always use a latex or synthetic condom during any sexual contact with females of reproductive potential and for up to 4 weeks after discontinuing, even if they have undergone a successful vasectomy. Male patients taking pomalidomide must not donate sperm.	Further investigation is required.	Pomalyst (pomalidomide) [package insert]. Summit, NJ; Celgene Corporation; 2022.
purixan	Contraindicated.	May cause fetal harm. An increased incidence of miscarriage has been reported in women who received mercaptopurine in the first trimester of pregnancy	Adverse embryo-fetal findings, including miscarriage and stillbirth, have been reported in women who received mercaptopurine after the first trimester of pregnancy. Advise pregnant women of the potential risk to a fetus. Advise males with female partners of reproductive potential to use effective contraception during treatment and for 3 months after the last dose.	Further investigation is required.	Purixan (purixan) [package insert]. Leicster, UK; Nova Laboratories, Ltd; 2020.
remdesivir	Ask a health professional before use.	No well controlled studies in pregnant women.	COVID-19 in pregnancy is associated with adverse maternal and fetal outcomes, including preeclampsia, eclampsia, preterm birth, premature rupture of membranes, venous thromboembolic disease, and fetal death.	Further investigation is required.	Veklury (remdesivir) [package insert]. Foster City, CA; Gilead Sciences Inc., 2022.
ribavirin	Contraindicated.	Black Box Warning: Significant teratogenic and embryocidal effects have been demonstrated in all animal species exposed to ribavirin. Therefore, therapy is contraindicated in women who are pregnant and in the male partners of women who are pregnant. Avoid pregnancy for 6 months in female partners of male patients who are taking therapy.	Male patients and their female partners should use effective contraception during treatment and during the 6-month period after treatment has been stopped.	Further investigation is required.	Rebetol (ribavirin) [package insert]. Whitehouse Station, NJ; Merck Sharp & Dohme Corp.; 2022.
riociguat	Contraindicated.	Black Box Warning: Do not administer to a pregnant female because it may cause fetal harm. For females, only available only through a restricted program called the Adempas REMS Program.	Consistently shown to have teratogenic effects when administered to animals. If this drug is used during pregnancy, or if the patient becomes pregnant while taking this drug, the patient should be apprised of the potential hazard to the fetus	Further investigation is required.	Adempas (riociguat) [package insert]. Whippany, NJ; Bayer HealthCare Pharmaceuticals Inc., 2021.
rosiglitazone maleate and glimepiride	Do not use during pregnancy. Use during pregnancy only if the potential benefit justifies the potential risk to the fetus.	No adequate and well-controlled studies in pregnant women.	Risk is increased in pregnancies complicated by hyperglycemia and may be decreased with good metabolic control. It is essential for patients with diabetes or history of gestational diabetes to maintain good metabolic control before conception and throughout pregnancy. Careful monitoring of glucose control is essential in such patients. Most experts recommend that insulin monotherapy be used durin…	Further investigation is required in both rosiglitazone and glimepiride.	Avandryl (rosiglitazone maleate and glimepiride) [package insert]. Research Triangle Park, NC; GlaxoSmithKline; 2015.
simeprevir	Contraindicated.	If administered with ribavirin, the combination regimen is contraindicated in pregnant women and in men whose female partners are pregnant. No adequate human data are available to establish whether or not simeprevir poses a risk to pregnancy outcomes.	Advise patients taking simeprevir of the potential risk to the fetus.	Further investigation is required.	Olysio (simeprevir) [package insert]. Titusville NJ; Janssen Therapeutics, Division of Janssen Products, LP; 2018.
sodium iodide I 131	Contraindicated.	May cause severe and irreversible hypothyroidism in the neonate.	Sodium iodide I 131 crosses the placenta and fetal exposure can lead to neonatal hypothyroidism. Some cases were severe and irreversible. Advise females and males of reproductive potential to use effective contraception during treatment and for at least 6 months after the last dose.	Further investigation is required.	Hicon (Sodium Iodide I 131) [package insert]. Kirkland, Quebec; Jubilant Radiopharma; 2022.
sonidegib	Contraindicated.	Black Box Warning: Can cause embryo-fetal death or severe birth defects when administered to a pregnant woman and is embryotoxic, fetotoxic, and teratogenic in animals. Advise males of the potential risk of exposure through semen and to use condoms with a pregnant partner or a female partner of reproductive potential during treatment and for at least 8 months after the last dose.	There are no available data on the use of the treatment in pregnant women.	Further investigation is required.	Odomzo (sonidegib) [package insert]. Cranbury, NJ; Sun Pharmaceutical Industries, Inc.; 2022.
tafenoquine	Contraindicated.	If a pregnancy is detected during use, discontinue as soon as possible and switch to an alternative prophylactic drug for malaria during pregnancy.	May cause fetal harm when administered to a pregnant woman with a G6PD-deficient fetus. Not recommended during pregnancy.	Further investigation is required.	Arakoda (tafenoquine) [package insert]. Washington, DC; 60 Degrees Pharmaceuticals, LLC; 2021.
talimogene laherparepvec	Contraindicated.	Do not administer to pregnant patients. Adequate and well-controlled studies have not been conducted in pregnant women.	The patient should be apprised of the potential hazards to the fetus and neonate.	Further investigation is required.	Imlygic (talimogene laherparepvec) [package insert]. Thousand Oaks, California; Amgen Inc.; 2022.
tazarotene	Contraindicated.	May cause fetal harm when topically administered to a pregnant woman. The potential risk to the fetus outweighs the potential benefit to the mother; therefore, discontinue as soon as pregnancy is recognized.	Safety in pregnant patients has not been established.	Further investigation is required.	Arazlo (tazarotene) lotion [package insert]. Bridgewater, NJ; Bausch Health Companies Inc.; 2022.
thalidomide	Contraindicated.	Black Box Warning: If taken during pregnancy, it can cause severe birth defects or embryo-fetal death. Should never be used by females who are pregnant or who could be pregnant while taking the drug. Even a single dose [1 capsule (regardless of strength)] taken by a pregnant woman during her pregnancy can cause severe birth defects.	Thalidomide is present in the semen of patients. Therefore, males must always use a latex or synthetic condom during any sexual contact with females of reproductive potential while taking and for up to 4 weeks after discontinuing, even if they have undergone a successful vasectomy. Male patients taking thalomide must not donate sperm	Further investigation is required.	Thalomid (thalidomide) [package insert]. Summit, NJ; Celgene Coporation; 2022.
thiamine HCl	Use only if the potential benefit justifies the potential risk to the fetus.	Studies in pregnant women have not shown that thiamine hydrochloride increases the risk of fetal abnormalities if administered during pregnancy.	If the drug is used during pregnancy, the possibility of fetal harm appears remote.	Further investigation is required.	Thiamine HCl (thiamine HCl) [package insert]. Schaumburg, IL; APP Pharmaceuticals, LLC; 2021.
teriflunomide	Contraindicated.	Black Box Warning: Stop treatment and use an accelerated drug elimination procedure if the patient becomes pregnant.	Women receiving treatment who wish to become pregnant or are pregnant must discontinue and undergo a cholestyramine or activated charcoal-based washout procedure, which includes verification that plasma concentrations of teriflunomide are less than 0.02 mg/L (0.02 mcg/mL).	Further investigation is required.	Aubagio (teriflunomide) [package insert]. Cambridge, MA; Genzyme Corporation; 2022.	Oh J, O'Connor PW. Teriflunomide. Neurol Clin Pract. 2013 Jun;3(3):254-260. doi: 10.1212/CPJ.0b013e318296f299. Erratum in: Neurol Clin Pract. 2013 Aug;3(4):275.
tretinoin	Contraindicated.	May cause fetal harm.	The systemic levels following topical administration are lower than with administration of oral tretinoin; however, absorption of this product may result in fetal exposure. There are reports of major birth defects similar to those seen in infants exposed to oral retinoids, but these case reports do not establish a pattern or association with tretinoin-related embryopathy.	Further investigation is required.	Altreno (tretinoin) [package insert]. Laval, Quebec; Bausch Health US, LLC; 2020.
upadacitinib	Contraindicated.	May cause fetal harm.	Advise pregnant women of the potential risk to a fetus. Available data from the pharmacovigilance safety database and postmarketing case reports on use in pregnant women are not sufficient to evaluate a drug-associated risk for major birth defects or miscarriage.	Further investigation is required.	Rinvoq (Upadacitinib) [package insert]. North Chicago, IL; AbbVie Inc.; 2022.
vericiguat	Contraindicated.	Black Box Warning: Do not administer to a pregnant female because it may cause fetal harm.	Advise females of reproductive potential of the potential risk to a fetus. There are no available data on use in pregnant women.	Further investigation is required.	Verquvo (vericiguat) [package insert]. Rahway, NJ; Merck Sharp & Dohme LLC; 2022.
vilazodone hydrochloride	Ask a health professional before use.	Third trimester use may increase risk for persistent pulmonary hypertension and withdrawal in the newborn.	There are no adequate and well controlled studies in pregnant women.	Further investigation is required.	Viibryd (vilazodone hydrochloride) [package insert]. Madison, NJ; Allergan USA, Inc.; 2021.
vismodegib	Contraindicated.	Black Box Warning: Based on their mechanism of action, a selective Hh pathway inhibitor, may cause embryo-fetal death or severe birth defects when administered to a pregnant woman. Vismodegib is embryotoxic, fetotoxic, and teratogenic in animals. Teratogenic effects included severe midline defects, missing digits, and other irreversible malformations. Advise pregnant women of the potential risks …	Advise pregnant women of the potential risk to a fetus. Vismodegib is present in semen. It is not known if the amount of vismodegib in semen can cause embryo-fetal harm. Advise males to use condoms, even after a vasectomy, to avoid potential drug exposure in pregnant partners and female partners of reproductive potential during therapy and for 3 months after the final dose. Advise male patients n…	Further investigation is required.	Erivedge (vismodegib) [package insert]. South San Francisco, CA; Genentech USA, Inc.; 2022.

## Sheet: Table 3B
Drug	Recommendation	Reasoning	Safety	Citation
aliskiren hemifumarate, amlodipine besilate	Should not be used during the first trimester of pregnancy and is contraindicated during the second and third trimesters.	Other substances, like aliskiren, that act directly on the RAAS have been associated with serious fetal malformations and neonatal death. There are no data on the use of aliskiren in pregnant women.	Advise pregnant women of the potential risk to a fetus.	Rasilamlo (aliskiren hemifumarate, amlodipine besilate) [package insert]. Camberley, UK; Novartis Europharm Ltd; 2017
chenodeoxycholic acid	Chenodeoxycholic acid is not recommended during pregnancy.	There are no or limited amount of data from the use of chenodeoxycholic acid in pregnant women.	Advise pregnant women of the potential risk to a fetus.	Chenodeocycholic Acid Leadiant (chenodeocycholic acid) [package insert]. Munich, Germany; Leadiant GmbH; 2017.
irinotecan hydrochloride trihydrate	Contraindicated.	May cause fetal harm. There are no adequate data on use in pregnant women.	Based on results from animal studies and the mechanism of action of irinotecan, should not be used during pregnancy unless clearly necessary. Males should use condoms during treatment and 4 months after.	Onivyde (irinotecan hydrochloride trihydrate) [package insert]. Suresnes cedex, France; Les Laboratoires Servier; 2016.
pandemic influenza vaccine (whole virion, inactivated, adjuvanted)	Health care providers need to assess the risks and benefits of administering the vaccine to pregnant women.	No data have been generated with use in pregnant women.	Data from vaccinations with interpandemic trivalent vaccines in pregnant women do not indicate that adverse fetal and maternal outcomes were attributable to the vaccine.	Daronrix (Pandemic influenza vaccine (whole virion, inactivated, adjuvanted)) [package insert]. Rixensart, Belgium; GlaxoSmithKline Biologicals; 2013.
talimogene laherparepvec	Contraindicated. Preferrable if not used. If used during pregnancy, the patient should be apprised of the potential hazards to the fetus and/or neonate.	Adequate and well controlled studies with talimogene laherparepvec have not been conducted in pregnant women.	If a pregnant woman has an infection with wild type HSV-1 (primary or reactivation), there is potential for the virus to cross the placental barrier, and also a risk of transmission during birth due to viral shedding. Infections with wild-type HSV-1 have been associated with serious adverse effects, including multi-organ failure and death, if a fetus or neonate contracts the wild type herpes infe…	Imlygic (talimogene laherparepvec) [package insert]. Breda, the Netherlands; Amgen Europe B.V.; 2022.
treosulfan	Contraindicated.	May cause fetal harm. There are no data from the use of treosulfan in pregnant women.	Use an effective method of contraception when either patient or partner is receiving this medicine.	Trecondi (treosulfan) [package insert]. Wedel, Germany; Medac Gesellschaft für klinische Spezialpräparate; 2020.
